# Supplementary material for: Psychosocial work demands and physical workload decrease with ageing in blue-collar and white-collar workers: a prospective study based on the SLOSH cohort
Source: PubMed Central journal article supplement — BMJ Open. 2019 Sep 17;9(9):e030918. doi: 10.1136/bmjopen-2019-030918 (PMC6756455; doi:10.1136/bmjopen-2019-030918), 2019-09-17
Supplement: bmjopen-2019-030918.draft_revisions.pdf [file bmjopen-2019-030918.draft_revisions.pdf]

# BMJ Open

BMJ Open is committed to open peer review. As part of this commitment we make the peer review history of every article we publish publicly available.

When an article is published we post the peer reviewers' comments and the authors' responses online. We also post the versions of the paper that were used during peer review. These are the versions that the peer review comments apply to.

The versions of the paper that follow are the versions that were submitted during the peer review process. They are not the versions of record or the final published versions. They should not be cited or distributed as the published version of this manuscript.

BMJ Open is an open access journal and the full, final, typeset and author-corrected version of record of the manuscript is available on our site with no access controls, subscription charges or pay-per-view fees (<http://bmjopen.bmj.com>).

If you have any questions on BMJ Open's open peer review process please email [info.bmjopen@bmj.com](mailto:info.bmjopen@bmj.com)

# BMJ Open

## **Psychosocial work demands and physical workload decrease with aging in blue and white-collar workers: A prospective study based on the SLOSH cohort**

|                               |                                                                                                                                                                                                                                                                           |
|-------------------------------|---------------------------------------------------------------------------------------------------------------------------------------------------------------------------------------------------------------------------------------------------------------------------|
| Journal:                      | <i>BMJ Open</i>                                                                                                                                                                                                                                                           |
| Manuscript ID                 | bmjopen-2019-030918                                                                                                                                                                                                                                                       |
| Article Type:                 | Research                                                                                                                                                                                                                                                                  |
| Date Submitted by the Author: | 07-Apr-2019                                                                                                                                                                                                                                                               |
| Complete List of Authors:     | Åkerstedt, Torbjörn; Karolinska Institute, Clinical Neuroscience; Stockholm University, Stress Research Institute<br>Discacciati, Andrea; Karolinska Institutet, Institute of Environmental Medicine<br>Westerlund, Hugo; Stockholm University, Stress Research Institute |
| Keywords:                     | EPIDEMIOLOGY, OCCUPATIONAL & INDUSTRIAL MEDICINE, SOCIAL MEDICINE                                                                                                                                                                                                         |
|                               |                                                                                                                                                                                                                                                                           |

SCHOLARONE™  
Manuscripts

1  
2  
3  
4  
5  
6  
7  
8  
9  
10  
11  
12  
13

# Psychosocial work demands and physical workload decrease with aging in blue and white-collar workers: A prospective study based on the SLOSH cohort

14  
15  
16  
17  
18

Torbjörn Åkerstedt<sup>1,2</sup>, Andrea Discacciati<sup>3</sup>, Hugo Westerlund<sup>2</sup>

19  
20  
21  
22  
23  
24

1.Clinical Neuroscience, Karolinska Intsitutet, Stockholm, Sweden

2.Stress Research Institute, Stockholm University, Stockholm. Sweden

3.Institute of Environmental Medicine, Karolinska Institute, Stockholm, Sweden

25  
26  
27  
28  
29

Contact: Torbjörn Åkerstedt, Karolinska Institute, 17771, Stockholm

[torbjorn.akerstedt@ki.se](mailto:torbjorn.akerstedt@ki.se)

Phone: 46 737078928

30  
31

Word count: 3298

32  
33  
34  
35  
36  
37  
38  
39  
40  
41  
42  
43  
44  
45  
46  
47  
48  
49  
50  
51  
52  
53  
54  
55  
56  
57  
58  
59  
60

TÅ defined the research question, designed the study and wrote the manuscript

AD analyzed the data and commented on the manuscript

HW provided the cohort and commented on the manuscript

## ABSTRACT

### Objectives

Psychosocial work demands and physical work load are important causes of ill health. The dramatic demographic changes in society make it imperative to understand if such factors change with aging, but this is presently not known. The purpose of the present study was to investigate whether psychosocial work demands and physical workload change across eight years of aging, whether occupational groups show different trajectories of change, and if such trajectories are reflected in sleep or fatigue.

**Methods:** Cohort of 5000 participants was measured in 5 biannual waves across 8 years. Mixed model regression analyses was used to investigate change across aging.

### Results:

Psychosocial work demands decreased markedly across 8 years, with the strongest decrease in the high white-collar group, and the oldest group. Physical workload also decreased markedly, particularly in the blue-collar group, and in the oldest group. Fatigue decreased, and sleep problems increased with aging, but with similar slopes in the occupational groups.

### Conclusions:

The decrease in psychosocial work demands and physical workload suggests that the burden of work becomes lighter over time. The mechanism could be “pure” aging and/or increased experience, or related factors. The gradual improvement in the work situation should be considered in the discussion of the place of older individuals in the labor market, and of a suitable age for retirement. The results also mean that prospective studies of work and health need to consider the improvement in working life with aging.

1  
2  
3 Key words: work demands, stress, physical workload, fatigue, sleep, aging, occupational  
4  
5 group  
6  
7  
8  
9

### 10 **Strength and limitations of this study**

- 11 • A strength of this study is the longitudinal approach and relatively large sample size
- 12
- 13 • A limitation is the subjective nature of the data, although both main variables are, by
- 14 nature, subjective
- 15
- 16 • Another limitation is that we can not determine the mechanism behind the decreases
- 17 with aging
- 18
- 19
- 20
- 21
- 22
- 23
- 24
- 25
- 26
- 27
- 28
- 29
- 30
- 31
- 32
- 33
- 34
- 35
- 36
- 37
- 38
- 39
- 40
- 41
- 42
- 43
- 44
- 45
- 46
- 47
- 48
- 49
- 50
- 51
- 52
- 53
- 54
- 55
- 56
- 57
- 58
- 59
- 60

1  
2  
3 **What this paper adds:**  
4

5 What is already known about this subject?  
6

7  
8 We do not know if psychosocial workload and physical workload change with aging. No  
9  
10 studies have been carried out.  
11

12  
13  
14  
15 What this paper adds:  
16

17 We show that both if psychosocial work demands and physical workload decrease with  
18  
19 aging, and that the decrease in psychosocial work demands is steepest for high white-  
20  
21 collar workers and that the decrease in physical workload is steepest in blue-collar  
22  
23 workers  
24  
25  
26  
27  
28

29 How might it impact on clinical practice in the foreseeable future?  
30

31 Occupational health services may develop a more positive view of the capacity of older  
32  
33 employees. However, the major impact should be observed in the discussion of age and  
34  
35 a sustainable working life, as well as on decisions on a temporal extension of working  
36  
37 life  
38  
39  
40  
41  
42  
43  
44  
45  
46  
47  
48  
49  
50  
51  
52  
53  
54  
55  
56  
57  
58  
59  
60

## INTRODUCTION

Psychosocial work demands are a central factor in research on occupational stress,[1 ,2] and is also associated with cardiovascular and other diseases.[3] It involves a need to work fast, to handle difficult tasks or to have too little time for ones task. There is also a prospective link between work demands and disturbed sleep,[4-7] and with fatigue.[8 ,9] Sleep problems, in turn, predict a high utilization of health resources [10] and sickness absence.[11] Fatigue is associated with similar effects.[12-14]

Considering the demographic changes in western society it is an interesting question whether psychosocial work demands increase or decrease with aging. There are no previous studies of this issue, but there is a need to provide knowledge for the discussion of working life sustainability, and the feasibility of a later retirement age.

If there are changes in psychosocial work demands with aging, the patterns are likely to be different for blue and white-collar workers. The demands are higher among white-collar workers and one may speculate that changes with time might be larger in that group. [15 ,16]

Since work demands are linked to (poor) sleep and to fatigue, one might expect these variables to reflect changes in work demands. However, there are no data available, but we have seen that fatigue actually decreases with aging whereas sleep problems increase moderately.[17]

1  
2  
3 Another work related factor that should be considered in connection with work  
4 demands is physical workload. It is particularly associated with musculoskeletal pain,  
5 [18 ,19] but also with cardiovascular disease,[20 ,21] as well as with fatigue.[22] It is, for  
6 obvious reasons highest in blue-collar workers. As to effects of aging, the reasoning is  
7 similar to that for psychosocial work demands and no longitudinal studies of the effects  
8 of aging are available.  
9  
10  
11  
12  
13  
14  
15  
16  
17  
18

19 The purpose of the present study was to investigate whether work demands and  
20 physical workload change across eight years of work, whether occupational groups  
21 show different trajectories of change, and if such trajectories are reflected in trajectories  
22 of sleep or fatigue. Hypotheses are difficult to develop since aging involves reduced  
23 physical and cognitive work capacity, [23] [24] that should be linked to a perception of  
24 increased demands or workload, while increased work experience and career changes  
25 may be counterforces.  
26  
27  
28  
29  
30  
31  
32  
33  
34  
35  
36  
37

## 38 **METHODS**

### 39 **Design and participants**

40  
41  
42  
43 The study was based on the Swedish Longitudinal Occupational Survey of Health,  
44 SLOSH. It is an initially nationally representative longitudinal study with follow-up every  
45 second year (from 2006). It has its origins in the Swedish Work Environment Survey  
46 (SWES, [www.scb.se](http://www.scb.se)), which, in turn, is based on nationally representative samples of the  
47 working population.  
48  
49  
50  
51  
52  
53  
54  
55  
56  
57  
58  
59  
60



1  
2  
3 In the present paper we use data from waves 1-5 (T1-T5), including only employed  
4 individuals, and information on occupational group (from T2). This resulted in 5377  
5  
6 participants.  
7  
8  
9

10  
11  
12 The sample at T1 contained 43.2% males; 33.9% 18-42 year olds, 42.1% 43-56 year  
13 olds, and 24.1 % 57-68 year olds; 55.3% married; 53.4% with children (living at home);  
14  
15 80.2% in very or rather good health. Mean age  $\pm$  SD was 47.6 $\pm$ 11.6 years; 3.5% were not  
16  
17 working.  
18  
19  
20  
21  
22

## 23 24 **Variables**

25  
26  
27  
28  
29 Information regarding gender, age and occupation (blue-collar worker, white-collar  
30 workers, and managers), were derived from national register data at T2. The  
31  
32 occupational categories are based on the Statistics Sweden official classification of  
33  
34 occupations (SSYK) to produce the categories blue-collar workers (BCW), lower white  
35  
36 collar workers (LWC) and professionals and managers (HWC - high white-collar  
37  
38 workers). The N for the three groups was 2163, 2226, and 988, respectively.  
39  
40  
41  
42  
43  
44

45  
46 Work demands were measured using the Swedish version of the Demand-Control-  
47  
48 Support Questionnaire.[1] This scale has been extensively psychometrically  
49  
50 investigated, [2 ,25] and used to predict health outcomes of psychosocial work  
51  
52 factors.[26 ,27] The five items used were: "Do you have to work very intensively?" "Does  
53  
54 your work demand too much effort?" "Do you have enough time to do everything?"  
55  
56 (reverse coded) "Do you have to work very fast?" and "Does your work often involve  
57  
58  
59  
60

1  
2  
3 conflicting demands?”. The response alternatives ranged from 1: Hardly ever/never, to  
4  
5 4:Yes, often (scaled reversed from the original 4-1). Cronbach’s  $\alpha$  was 0.67 at T3.  
6  
7

8  
9  
10 Four items representing disturbed sleep were selected from the Karolinska Sleep  
11  
12 Questionnaire (KSQ) (Cronbach’s  $\alpha > 0.70$ ).[5 ,28-30] The scale differentiates  
13  
14 patients with insomnia from healthy individuals [29], and correlates with perceived  
15  
16 stress, anxiety, depression and burnout ( $r > .40$ ).[30] The items included are: difficulties  
17  
18 falling asleep, restless sleep, repeated awakenings, and premature awakening. The  
19  
20 responses range from “never” to “most days of the week” (1-6). Cronbach’s  $\alpha$  was  
21  
22 0.84 at time T3, and the correlation between time points was  $r = .71$ .  
23  
24  
25

26  
27 Ratings of fatigue were obtained from a single item phrased as “to what extent have you  
28  
29 been suffering from sluggishness or lack of energy”, with response alternatives from 1  
30  
31 (not at all) to 5 (very much). It is significantly correlated ( $r = 0.60, p < .001$ ) with  
32  
33 persistent fatigue and mental fatigue ( $r = 0.57, p < .001$ ) at T3.  
34  
35  
36

37  
38  
39 Physical workload was measured as an index of three questions: “Is your work such that  
40  
41 you have to use bent, twisted or otherwise unsuitable positions?” “Do you have to lift at  
42  
43 least 15 kilos several times a day?” “Does your work sometimes involve heavy physical  
44  
45 labor, that is, do you physically exert yourself more than when walking and standing and  
46  
47 moving around in a normal way?”. Response alternatives ranged from 1: No, not at all, to  
48  
49 6: Almost all the time. Cronbach’s  $\alpha$  was 0.89 for at T1, and the test-retest reliability  
50  
51 between T1 and T2 was  $r = .85$ .  
52  
53  
54  
55

## 56 57 58 **Statistical analysis** 59 60

1  
2  
3  
4  
5 To describe the mean trajectories of the outcomes over time (waves T1 – T5) for  
6 different occupational groups we used mixed-effects linear regression models.[31]  
7  
8 Regression models included occupational group (level-2 variable), time (level-1  
9 variable) and their two interaction (product) terms as fixed effects. Moreover, they  
10 included subject-specific random intercept and time slope to account for potential  
11 dependence among repeated values of the outcome variables over time. The analyses  
12 were adjusted for gender and age (level-2 variables). The overall difference in the slopes  
13 over time across the three occupational groups was assessed with a joint Wald test with  
14 2 degrees of freedom on the 2 interaction terms. Waves when an individual was not  
15 employed were not used in the analyses.  
16  
17  
18  
19  
20  
21  
22  
23  
24  
25  
26  
27  
28  
29  
30

31 In a second analysis, the subject-specific time slopes for work demands and physical  
32 workload were used as predictors for the other outcomes. More specifically, we first  
33 modelled work demands and physical workload using 2 mixed-effects linear regression  
34 models. These models included time as fixed effect with random intercept and slope. We  
35 then calculated subject-specific slopes by adding to the fixed-effects time coefficient the  
36 subject-specific best linear unbiased predictions (BLUPs) of the random slope. Finally,  
37 we used the subject-specific slopes as a fixed-effect in a separate mixed-effects linear  
38 regression model, adjusted for age and gender, with random intercept and random time  
39 slope.  
40  
41  
42  
43  
44  
45  
46  
47  
48  
49  
50  
51  
52  
53  
54

55 In a third analysis, we described the age-group-specific mean trajectories of the  
56 outcomes over time. This was done in an analogous fashion to what we described for the  
57  
58  
59  
60

1  
2  
3 main analysis. Age groups at were defined as: 18-42, 43-56, and 57-68 years of age. This  
4  
5 was also repeated with stratification within each occupational group.  
6  
7  
8  
9

### 10 **Data sharing, ethics, funding**

11  
12  
13  
14  
15 The data of this study cannot be directly shared, but applications for research using the  
16  
17 data base may submitted after discussions with the SLOSH scientific committee.  
18

19 The Regional Research Ethics Board in Stockholm approved the study. This study was  
20  
21 funded by the AFA Insurance company, Sweden.  
22  
23  
24  
25

### 26 **Patient and public involvement statement**

27  
28  
29  
30  
31 Patients were not involved in the present study  
32  
33  
34  
35  
36  
37

## 38 **RESULTS**

39  
40  
41  
42  
43 Figure 1 and Table 1 show the effects of time on self reported work demands The  
44  
45 decrease across time was significant for all occupational groups, and for each group  
46  
47 separately, although the effect for BCW was weak. The interaction between the  
48  
49 occupational groups was highly significant, that is, the three groups showed different  
50  
51 slopes over time. In addition, BCW showed (at T3) lower demands than HWC ( $0.06 \pm 0.02$ ,  
52  
53  $Z=3.2$ ,  $p=.000$ ), but LWC did not ( $-0.03 \pm 0.02$ ,  $Z=1.5$ ,  $p=.147$ ). Women showed higher  
54  
55 values (higher demands) than men ( $0.05 \pm 0.01$ ,  $Z=3.5$ ,  $p=.000$ ). The oldest group showed  
56  
57  
58  
59  
60

1  
2  
3 significantly lower work demands ( $0.14 \pm 0.02$ ,  $Z=7.8$ ,  $p=.000$ ) than the youngest group,  
4  
5 but the intermediate group did not ( $-0.02 \pm 0.01$ ,  $Z=$  ,  $p=.147$ ).  
6  
7  
8  
9

10 Figure 1 shows the effects of aging/work experience on physical workload in the three  
11 occupational groups. Table 1 shows that the decrease in workload was significant for the  
12 group as a whole and for LWC, and in particular for BCW. The interaction between  
13  
14 groups was highly significant. BCW showed (at T3) a significantly higher physical  
15 workload than HWC ( $1.948 \pm 0.044$ ,  $Z=44.5$ ,  $p=.000$ ), which also LWC did ( $0.521 \pm 0.044$ ,  
16  
17  $Z=11.9$ ,  $p=.000$ ). Women showed higher physical workload than men  $0.145 \pm 0.032$ ,  $Z=4.6$ ,  
18  
19  $p=.000$ ). The oldest group showed significantly lower physical load ( $0.115 \pm 0.041$ ,  $Z=2.8$ ,  
20  
21  $p=.006$ ) than the youngest group.  
22  
23  
24  
25  
26  
27  
28  
29  
30

31 Figure 1 shows the effect of time on fatigue in the three occupational groups. Table 1  
32 shows that the reduction in fatigue was significant in all three groups. The interaction  
33 was not significant and the level between groups did not differ significantly. However,  
34  
35 women had a significantly higher level of fatigue ( $0.25 \pm 0.02$ ,  $Z=10.4$ ,  $p=.000$ ). In addition,  
36  
37 older individuals showed significantly less fatigue ( $-0.37 \pm 0.03$ ,  $Z=11.7$ ,  $p=.000$ ) than the  
38  
39 young group. The intermediate age group also showed lower fatigue ( $-0.16 \pm 0.03$ ,  $Z=5.9$ ,  
40  
41  $p=.000$ }).  
42  
43  
44  
45  
46  
47  
48  
49

50 Figure 1 shows the effects of time on sleep problems in the three occupational groups.  
51 Table 1 shows that the increase in sleep problems was significant in all three groups.  
52  
53 The interaction was not significant and the level between groups did not differ  
54  
55 significantly. Women reported more sleep problems than men ( $0.28 \pm 0.03$ ,  $Z=10.8$ ,  
56  
57  
58  
59  
60

p=.000). The oldest individuals reported more sleep problems than the young ( $0.07\pm.03$ ,  $Z=2.17$ ,  $p=.03$ ); as did the intermediate group  $0.17\pm.03$  ( $Z=5.9$ ,  $p=.000$ ).

As a sensitivity analysis we repeated the previous analyses for those participants who had complete data for all five waves ( $N=1888$ ). The results were very similar to the previous results. The only differences was that the significant decrease in work demands for blue collar workers ( $p<.05$ ) and the significant decrease in fatigue for high white-collar workers ( $p<.05$ ) did not remain significant.

Figure 1

Table 1. Slopes of the different occupational groups for each variable. Coefficients of slope, standard error, Z-value, and p-value.  $N=5377$

| Occup groups        | Coeff±se            | Z                 | Chi2              | Coeff±se                 | Z                 | Chi2              |
|---------------------|---------------------|-------------------|-------------------|--------------------------|-------------------|-------------------|
|                     | <b>Work demands</b> | .                 |                   | <b>Physical workload</b> |                   |                   |
| All                 | -0.016±.001         | 12.2 <sup>c</sup> |                   | -0.033±.002              | 14.3 <sup>c</sup> |                   |
| HWC                 | -0.031±.003         | 10.6 <sup>c</sup> |                   | -0.008±.005              | 1.7               |                   |
| LWC                 | -0.029±.002         | 9.4 <sup>c</sup>  |                   | -0.019±.003              | 5.5 <sup>c</sup>  |                   |
| BCW                 | -0.005±.002         | 2.5 <sup>a</sup>  |                   | -0.050±.004              | 16.3 <sup>c</sup> |                   |
| Interaction         |                     |                   | 53.5 <sup>c</sup> |                          |                   | 94.0 <sup>c</sup> |
|                     | <b>Fatigue_rec</b>  |                   |                   | <b>Sleep problems</b>    |                   |                   |
| All,                | -0.018±.002         | 7.5 <sup>c</sup>  | .                 | 0.020±.002               | 9.4 <sup>c</sup>  |                   |
| HWC                 | -0.014±.005         | 2.6 <sup>a</sup>  |                   | 0.019±.005               | 4.2 <sup>a</sup>  |                   |
| LWC                 | -0.022±.004         | 5.9 <sup>c</sup>  |                   | 0.017±.003               | 5.2 <sup>c</sup>  |                   |
| BCW                 | -0.016±.004         | 4.1 <sup>a</sup>  |                   | 0.023±.003               | 6.8 <sup>c</sup>  |                   |
| <b>Interaction:</b> |                     |                   | 1.9               |                          |                   | 2.0               |

Results are adjusted for age and gender. a= $p<.05$ , b= $p<.01$ , c= $p<.001$

To test the direct association of changes between work demands and the other variables we used a mixed model regression and computed the relation between the individual slopes in work demands and in the other variables. Table 2 shows that when work demands decreased, also physical work demands, fatigue, and sleep problems decreased. Fatigue and sleep problems also decreased when physical workload decreased, but the association was weaker.

Table 2. The regression of the slopes of work demands and physical workload vs other slopes. Mixed model regression

| Work demand slope vs slope of: | Work demands vs Coeff±se | Z    | p    | Physical workload vs Coeff±se | Z   | p    |
|--------------------------------|--------------------------|------|------|-------------------------------|-----|------|
| Phys workolad                  | 0.204±.031               | 6.5  | .000 |                               |     |      |
| Fatigue                        | 0.106±.010               | 10.9 | .000 | 0.010±.004                    | 2.4 | .018 |
| Sleep problems                 | 0.243±.022               | 11.1 | .000 | 0.028±.010                    | 2.9 | .004 |

Adjusted for age and gender. Z=Z value, p=significance level. a=p<.05, b=p<.01, c=p<.001

Since there is a possibility that the change across time in the main analysis might be different in different age groups we also analyzed the trajectories within three age groups – 18-42 years, 42-56 years, and 57-68 years, adjusted for gender. Table 3 shows a strong interaction between work demands and age groups, with the largest decrease in the oldest group, although all three trajectories were significant. For physical workload, the trajectories of each age group was significant, but the interaction was not.

There was a similar pattern for fatigue and sleep problems. In both cases the interaction was significant. For fatigue the oldest group showed the strongest decrease, whereas for sleep problems the youngest group showed the strongest increase, while the oldest group showed a decrease. In all cases the decrease was largest in the oldest group. For sleep problems, the interaction between age groups was significant, but here the oldest group had the smallest reduction.

The same analysis subdivided on occupational group showed similar results. For work demands the interaction between time and age group was significant in all three occupational groups and the decrease strongest in the oldest group. For physical work demands no significant interactions were obtained. For fatigue the interaction was significant in the LWC and BWC groups, with the strongest decrease in the oldest group.

For sleep problems all three occupational groups showed significant interactions, with the lowest increase in the oldest group.

Table 3. Trajectories across 8 years of work demands and physical workload for 3 age groups for the full group and for each occupational group

| Age groups, All participants | Coeff±se            | Z                 | Chi2              | Coeff±se                 | Z                 | Chi2              |
|------------------------------|---------------------|-------------------|-------------------|--------------------------|-------------------|-------------------|
| <b>Work demands</b>          |                     |                   |                   | <b>Physical workload</b> |                   |                   |
| 18-42                        | -0.006±.002         | 3.0 <sup>b</sup>  |                   | -0.038±.004              | 9.6 <sup>c</sup>  |                   |
| 43-56                        | -0.017±.002         | 9.1 <sup>c</sup>  |                   | -0.033±.003              | 10.2 <sup>c</sup> |                   |
| 57-68                        | -0.039±.004         | 10.6 <sup>a</sup> |                   | -0.028±.006              | 5.1 <sup>c</sup>  |                   |
| <b>Interaction</b>           |                     |                   | 61.1 <sup>c</sup> |                          |                   | 1.9               |
| <b>Fatigue</b>               |                     |                   |                   | <b>Sleep problems</b>    |                   |                   |
| 18-42                        | -0.014±.004         | 3.3 <sup>c</sup>  |                   | 0.028±.003               | 8.0 <sup>c</sup>  |                   |
| 43-56                        | -0.014±.003         | 4.0 <sup>c</sup>  |                   | 0.023±.003               | 7.7 <sup>c</sup>  |                   |
| 57-68                        | -0.044±.006         | 7.7 <sup>c</sup>  |                   | -0.011±.005              | 2.3 <sup>a</sup>  |                   |
| <b>Interaction</b>           |                     |                   | 20.3 <sup>c</sup> |                          |                   | 39.5 <sup>c</sup> |
|                              | <b>Work demands</b> |                   |                   | <b>Physical workload</b> |                   |                   |
| <b>HWC</b>                   |                     |                   |                   |                          |                   |                   |
| <b>Age groups</b>            |                     |                   |                   |                          |                   |                   |
| 18-42                        | -0.018±.004         | 4.9 <sup>c</sup>  |                   | -0.012±.004              | 3.0 <sup>b</sup>  |                   |
| 43-56                        | -0.033±.003         | 7.8 <sup>c</sup>  |                   | -0.007±.003              | 2.4 <sup>b</sup>  |                   |
| 57-68                        | -0.055±.008         | 6.6 <sup>c</sup>  |                   | -0.003±.006              | 0.4               |                   |
| <b>Interaction</b>           |                     |                   | 19.5 <sup>c</sup> |                          |                   | 2.1               |
| <b>LWC</b>                   |                     |                   |                   |                          |                   |                   |
| <b>Age groups</b>            |                     |                   |                   |                          |                   |                   |
| 18-42                        | -0.006±.003         | 1.7               |                   | -0.023±.006              | 4.1 <sup>c</sup>  |                   |
| 43-56                        | -0.021±.003         | 7.7 <sup>c</sup>  |                   | -0.018±.005              | 3.9 <sup>c</sup>  |                   |
| 57-68                        | -0.040±.005         | 7.4 <sup>c</sup>  |                   | -0.019±.008              | 2.5 <sup>a</sup>  |                   |
| <b>Interaction</b>           |                     |                   | 33.3 <sup>c</sup> |                          |                   | 0.7               |
| <b>BCW</b>                   |                     |                   |                   |                          |                   |                   |
| <b>Age groups</b>            |                     |                   |                   |                          |                   |                   |
| 18-42                        | -0.001±.003         | 0.3               |                   | -0.065±.008              | 8.0 <sup>c</sup>  |                   |
| 43-56                        | -0.004±.003         | 1.3               |                   | -0.058±.006              | 9.1 <sup>c</sup>  |                   |
| 57-68                        | -0.024±.006         | 4.1 <sup>c</sup>  |                   | -0.051±.013              | 3.9 <sup>c</sup>  |                   |
| <b>Interaction</b>           |                     |                   | 11.9 <sup>c</sup> |                          |                   | 1.0               |
|                              | <b>Fatigue</b>      |                   |                   | <b>Sleep problems</b>    |                   |                   |
| <b>HWC</b>                   |                     |                   |                   |                          |                   |                   |
| <b>Age group</b>             |                     |                   |                   |                          |                   |                   |
| 18-42                        | -0.017±.009         | 1.9               |                   | 0.017±.007               | 2.4 <sup>c</sup>  |                   |
| 43-56                        | -0.008±.007         | 1.0               |                   | 0.029±.007               | 4.1 <sup>c</sup>  |                   |
| 57-68                        | -0.025±.012         | 2.1 <sup>a</sup>  |                   | -0.025±.012              | 2.1               |                   |
| <b>Interaction</b>           |                     |                   | 1.5               |                          |                   | 6.2 <sup>a</sup>  |
| <b>LWC</b>                   |                     |                   |                   |                          |                   |                   |
| <b>Age groups</b>            |                     |                   |                   |                          |                   |                   |
| 18-42                        | -0.016±.007         | 2.4 <sup>a</sup>  |                   | 0.027±.005               | 5.1 <sup>c</sup>  |                   |
| 43-56                        | -0.017±.006         | 3.0 <sup>b</sup>  |                   | 0.020±.005               | 4.3 <sup>c</sup>  |                   |
| 57-68                        | -0.051±.009         | 5.7 <sup>c</sup>  |                   | -0.015±.007              | 2.0 <sup>a</sup>  |                   |
| <b>Interaction</b>           |                     |                   | 10.6 <sup>b</sup> |                          |                   | 20.6 <sup>c</sup> |
| <b>BCW</b>                   |                     |                   |                   |                          |                   |                   |
| <b>Age groups</b>            |                     |                   |                   |                          |                   |                   |
| 18-42                        | -0.009±.007         | 1.4               |                   | 0.033±.006               | 5.7 <sup>c</sup>  |                   |
| 43-56                        | -0.014±.005         | 2.5 <sup>a</sup>  |                   | 0.024±.005               | 5.8 <sup>c</sup>  |                   |
| 57-68                        | -0.047±.010         | 4.0 <sup>c</sup>  |                   | -0.012±.008              | 1.4               |                   |
| <b>Interaction</b>           |                     |                   | 10.6 <sup>b</sup> |                          |                   | 16.4 <sup>c</sup> |

HWC=high white collar workers, LWC=low white collar workers, BCW=Blue collar workers  
a=p<.05, b=p<.01, c=p<.001



## DISCUSSION

Work demands decreased significantly within individuals over time in all three occupational groups, but also the interaction was highly significant. The steepest decrease was seen in HWC. The latter group also showed the overall highest level of work demands. Physical workload showed a decrease for the BCW and LWC groups and a significant interaction across occupational groups, with BCW showing the highest mean level. The changes in both variables were strongest in the oldest group. Sleep problems increased and fatigue decreased in all three occupational groups, but there was no interaction between groups. There was also a strong association between the decreased work demands and sleep and fatigue variables. For physical workload the associations were less strong.

The decrease in work demands across time is a new finding. The decrease was pronounced and present in all three occupational groups. The impression is that the work demand situation improves with time, which should be a positive finding for individuals in high demand situations. The results should have implications for discussions of sustainable work and for the temporal extension of working life. In addition, the results have implications for the interpretation of results of prospective research studies, since a follow-up time of eight years or more would mean a lower exposure to work demands across time, leading to a likely attenuation of the effects of high work demand levels on later disease outcomes.

We are not able to determine the reason for the decrease in work demands, but it is likely that increased experience makes one more competent to handle work tasks. Aging

1  
2  
3 could possibly contribute considering the associated reduction in fatigue,[17] together  
4 with what seems to be a reduced need for sleep.[32] Both may result in better resources  
5 to handle difficult work situations. This reasoning clearly needs empirical support,  
6  
7  
8 however.  
9  
10

11  
12  
13  
14  
15 The difference in steepness in the decrease of work demands in the three occupational  
16 groups could possibly be interpreted as differences in the positive effects of work  
17 experience or fatigue. Professional groups and managers usually have more complex  
18 work tasks for which experience may have more dramatic effects on master than what  
19 may be the cases for blue-collar workers. Again, this notion lacks support in the  
20 literature.  
21  
22  
23  
24  
25  
26  
27  
28  
29  
30

31 The difference in steepness in the decrease of physical workload in the three  
32 occupational groups was large. Thus, the decrease in BCW was very pronounced, while  
33 no decrease was seen in the HWC, and the latter group also had a lower level of physical  
34 workload. As with the decrease in work demands in HWC, one could speculate that  
35 experience may increase the physical capacity and perhaps the skill to handle physical  
36 workload in BCW. One might also conceive of experience leading to a move to work  
37 tasks with less physical load. These lines of reasoning are speculation, however, and  
38 studies specifically focused on these issues are needed.  
39  
40  
41  
42  
43  
44  
45  
46  
47  
48  
49  
50

51  
52 As expected, the individual slopes of the decrease in work demands were associated  
53 with a decrease in fatigue, as well as a lower increase in sleep problems (or a decrease).  
54 This is in line with the day-to-day association between the three variables in a diary  
55 study across 42 days and strengthens the notion of a link between work demands and  
56  
57  
58  
59  
60

1  
2  
3 sleep quality, as well as with fatigue.[33] However, aging is probably also involved in  
4  
5 this, as demonstrated in a previous study, [17] but the changes in aging and work  
6  
7 demands are not possible to separate in the present design.  
8  
9

10  
11  
12 The slope of sleep problems and fatigue showed a similar change for all occupational  
13  
14 groups and, thus, did not reflect the different trajectories for psychosocial work  
15  
16 demands and physical workload of the occupational groups. This was unexpected,  
17  
18 particularly since at least psychosocial work demands have been linked to fatigue and  
19  
20 sleep problems in previous studies,[17 ,34], and since the present data (table 2) shows  
21  
22 clear associations between work demands and sleep problems on the individual level.  
23  
24  
25

26  
27  
28  
29 The stratification on age showed that the decrease in work demands was largest in the  
30  
31 oldest group, less in the middle group, and smallest in the young group. All participants  
32  
33 were still employed at the last point of measurement, so formal retirement does not  
34  
35 seem to be implicated as a cause. However, we have no information on possible  
36  
37 reductions in work hours. It might be argued that there is no reason why work demands,  
38  
39 which describes speed, difficulty, effort, etc, should be reduced, but the overall  
40  
41 impression of workload may have such an effect. In a recent experiment with a 25%  
42  
43 reduction of work hours, one main result was a reduction in work demands.[35] The fact  
44  
45 that the reduction in the present study was considerable also in the middle age group  
46  
47 suggests that reduced work hours should not have been the only cause, since part-time  
48  
49 work is unusual in that group. This is also supported by the significant effect in the  
50  
51 youngest group. Another, probably important, factor should be the effect of experience  
52  
53 on the ability to handle work demands, and possibly, also the effect of promotion to  
54  
55 positions with more control over the work situation. Furthermore, loss of, particularly  
56  
57  
58  
59  
60

1  
2  
3 physical work capacity might result in transfer to less demanding work tasks. However,  
4  
5 the present study did not contain variables that make it possible to judge effects of  
6  
7 increased experience, promotion or change of work tasks.  
8  
9

10  
11  
12 Also fatigue showed a pattern of largest reduction in the oldest group, which agrees with  
13  
14 findings of lower fatigue in older individuals.[36] Sleep problems showed a similar  
15  
16 pattern, although here the oldest group lacked the impairment over time over time that  
17  
18 the younger groups had. Previous work has consistently found sleep problems to  
19  
20 increase with age, but there is no previous data on the lack of increase in sleep problems  
21  
22 in older individuals across time, except for our own previous study on the same  
23  
24 material.[17] The same factors as discussed above may be invoked also in this case, but  
25  
26 there may also be effects of aging itself.  
27  
28  
29  
30  
31  
32

33  
34 The age effect was comparable within the three occupational groups, the only exception  
35  
36 being HWC, who lacked a significant interaction between time and age group for fatigue.  
37  
38 The reason for this is unknown, but that group had a very weak coefficient for change  
39  
40 over time when all subjects were combined.  
41  
42  
43  
44

45  
46 The decrease of psychosocial work demands and physical workload across time leaves a  
47  
48 positive impression of the aging process in working life. Work appears to become easier  
49  
50 with time. The observation that the effect is largest in the oldest groups indicates that  
51  
52 from this point of view working life is sustainable. It also indicates that a temporal  
53  
54 extension of working life could well be acceptable to many individuals, at least those still  
55  
56 in good health. This is further accentuated by the reduction of fatigue with time.  
57  
58  
59  
60

1  
2  
3 There are some limitations to the present study. Firstly, all data are subjective, but this  
4 is difficult to avoid since there are no objective measures of work demands, or of sleep  
5 quality. Actigraphy measurement of sleep duration, [37] would have been preferable to  
6 self-reports, but was not used in the present case. With the present analysis we cannot  
7 draw any conclusions regarding causation, but that was not the purpose of the study.  
8 Rather, the purpose was to study whether aging or time at work would affect work  
9 demands, and that steered the analysis towards the approach of evaluating slopes over  
10 time. The strength of the study is the longitudinal approach, which makes it possible to  
11 evaluate the effects of time.  
12  
13  
14  
15  
16  
17  
18  
19  
20  
21  
22  
23  
24  
25  
26  
27  
28  
29  
30  
31  
32  
33  
34  
35  
36  
37  
38  
39  
40  
41  
42  
43  
44

26 The results suggest that increased time of exposure to work markedly reduces  
27 psychosocial work demands and physical workload with the strongest effects among  
28 high white-collar workers and blue-collar workers, respectively. The results also suggest  
29 a link between decreased work demands and decreased fatigue, mainly in high white-  
30 collar workers. The results suggest a positive development of psychosocial work  
31 demands and physical workload across time and this observation should be useful in the  
32 discussions of a sustainable working life and of a temporal extension of working life.  
33  
34  
35  
36  
37  
38  
39  
40  
41  
42  
43  
44

## 45 **ACKNOWLEDGEMENTS**

46  
47  
48  
49 This work was supported by the AFA Insurance Company. No conflicts of interest have  
50 been reported. The data of this study may be accessed after applications to HW and after  
51 filing an application for ethical approval with the Ethical Committee of the Region of  
52 Stockholm, Sweden.  
53  
54  
55  
56  
57  
58  
59  
60

**REFERENCES**

1. Theorell T, Perski A, Åkerstedt T, et al. Changes in job strain in relation to changes in physiological state. *Scand J Work, Environ Health* 1988;14:189-96.
2. Fransson E, Nyberg S, Heikkilä K, et al. Comparison of alternative versions of the job demand-control scales in 17 European cohort studies: the IPD-Work consortium. *BMC Publ Health* 2012;12:62.
3. Kivimaki M, Steptoe A. Effects of stress on the development and progression of cardiovascular disease. *Nat Rev Cardiol* 2017.
4. de Lange AH, Kompier MA, Taris TW, et al. A hard day's night: a longitudinal study on the relationships among job demands and job control, sleep quality and fatigue. *J Sleep Res* 2009;18:374-83.
5. Akerstedt T, Nordin M, Alfredsson L, et al. Predicting changes in sleep complaints from baseline values and changes in work demands, work control, and work preoccupation--the WOLF-project. *Sleep Med* 2012;13:73-80.
6. Magnusson Hanson LL, Akerstedt T, Naswall K, et al. Cross-lagged relationships between workplace demands, control, support and sleep problems. *Sleep* 2011;34:1403-10.
7. Akerstedt T, Garefelt J, Richter A, et al. Work and Sleep--A Prospective Study of Psychosocial Work Factors, Physical Work Factors, and Work Scheduling. *Sleep* 2015;38:1129-36.
8. Maslach C, Leiter MP. Stress and burnout: The critical research. In: Cooper CL, ed. *Handbook of stress medicine and health*. Lancaster, UK: CRC Press, 2005:155-72.
9. Avlund K. Fatigue in older adults: an early indicator of the aging process? *Aging Clin Exp Res* 2010;22:100-15.

- 1  
2  
3 10. Kuppermann M, Lubeck DP, Mazonson PD, et al. Sleep problems and their correlates  
4  
5 in a working population. *J Gen Intern Med* 1995;10:25-32.  
6  
7
- 8 11. Lallukka T, Haaramo P, Rahkonen O, et al. Joint associations of sleep duration and  
9  
10 insomnia symptoms with subsequent sickness absence: the Helsinki Health  
11  
12 Study. *Scand J Publ Health* 2013;41:516-23.  
13  
14
- 15 12. Watt T, Gronenvold M, Bjorner JB, et al. Fatigue in the Danish general population.  
16  
17 Influence of sociodemographic factors and disease. *J Epidemiol Comm Health*  
18  
19 2000;54:827-33.  
20  
21
- 22 13. Janssen N, Kant IJ, Swaen GM, et al. Fatigue as a predictor of sickness absence: results  
23  
24 from the Maastricht cohort study on fatigue at work. *Occup Environ Med* 2003;60  
25  
26 Suppl 1:i71-6.  
27  
28
- 29 14. Akerstedt T, Kecklund G, Alfredsson L, et al. Predicting long-term sickness absence  
30  
31 from sleep and fatigue. *J Sleep Res* 2007;16:341-5.  
32  
33
- 34 15. Hallqvist J, Diderichsen F, Theorell T, et al. Is the effect of job strain on myocardial  
35  
36 infarction risk due to interaction between high psychological demands and low  
37  
38 decision latitude? Results from Stockholm Heart Epidemiology Program (SHEEP).  
39  
40 *Soc Sci Med* 1998;46:1405-15.  
41  
42
- 43 16. Johnson JV, Hall EM, Theorell T. Combined effects of job strain and social isolation on  
44  
45 cardiovascular disease morbidity and mortality in a random sample of the  
46  
47 Swedish male working population. *Scand J Work Environ Health* 1989;15:271-79.  
48  
49
- 50 17. Akerstedt T, Discacciati A, Miley-Akerstedt A, et al. Aging and the Change in Fatigue  
51  
52 and Sleep - A Longitudinal Study Across 8 Years in Three Age Groups. *Front*  
53  
54 *Psychol* 2018;9:234.  
55  
56
- 57 18. 1. Nyman T, Mulder M, Iliadou A, et al. Physical workload, low back pain and neck-shoulder  
58  
59 pain: a Swedish twin study. *Occup Environ Med* 2009;66:395-401.  
60

19. Widanarko B, Legg S, Devereux J, et al. Interaction between physical and psychosocial risk factors on the presence of neck/shoulder symptoms and its consequences. *Ergonomics* 2015;58:1507-18.
20. Clays E, Casini A, Van Herck K, et al. Do psychosocial job resources buffer the relation between physical work demands and coronary heart disease? A prospective study among men. *Int Arch Occup Environ Health* 2016;89:1299-307.
21. Krause N, Brand RJ, Arah OA, et al. Occupational physical activity and 20-year incidence of acute myocardial infarction: results from the Kuopio Ischemic Heart Disease Risk Factor Study. *Scand J Work Environ Health* 2015;41:124-39.
22. Åhsberg E. Dimensions of fatigue in different working populations. *Scand J Psychol* 2000;41:231-41.
23. Ross D. Ageing and work: an overview. *Occup Med (Lond)* 2010;60:169-71.
24. Fisher GG, Chaffee DS, Tetrick LE, et al. Cognitive functioning, aging, and work: A review and recommendations for research and practice. *J Occup Health Psychol* 2017;22:314-36.
25. Chungkham HS, Ingre M, Karasek R, et al. Factor structure and longitudinal measurement invariance of the demand control support model: an evidence from the Swedish Longitudinal Occupational Survey of Health (SLOSH). *PLoS One* 2013;8:e70541.
26. Kivimäki M, Nyberg ST, Batty GD, et al. Job strain as a risk factor for coronary heart disease: a collaborative meta-analysis of individual participant data. *The Lancet* 2012;380:1491-97.
27. Magnusson Hanson LL, Madsen IE, Westerlund H, et al. Antidepressant use and associations with psychosocial work characteristics. A comparative study of Swedish and Danish gainfully employed. *J Aff Disorders* 2013;149:38-45.



- 1  
2  
3 28. Åkerstedt T, Knutsson A, Westerholm P, et al. Sleep disturbances, work stress and  
4  
5 work hours. A cross-sectional study. *J Psychosom Res* 2002;53:741-48.  
6  
7  
8 29. Akerstedt T, Ingre M, Broman JE, et al. Disturbed sleep in shift workers, day workers,  
9  
10 and insomniacs. *Chronobiol Int* 2008;25:333-48.  
11  
12 30. Nordin M, Akerstedt T, Nordin S. Psychometric evaluation and normative data for the  
13  
14 Karolinska Sleep Questionnaire. *Sleep Biol Rhythms* 2013;11:216-26.  
15  
16  
17 31. Rabe-Hesketh S, Skrondal A. Multilevel and Longitudinal Modeling Using Stata. First  
18  
19 Edition ed. Texas: Stata Press, 2005.  
20  
21  
22 32. Akerstedt T, Ghilotti F, Grotta A, et al. Sleep duration and mortality - Does weekend  
23  
24 sleep matter? *J Sleep Res* 2018:e12712.  
25  
26  
27 33. Akerstedt T, Axelsson J, Lekander M, et al. Do sleep, stress, and illness explain daily  
28  
29 variations in fatigue? A prospective study. *J Psychosom Res* 2014;76:280-85.  
30  
31  
32 34. Åkerstedt T, Orsini N, Petersen H, et al. Predicting sleep quality from stress and prior  
33  
34 sleep - A study of day-to-day covariation across six weeks. *Sleep Med*  
35  
36 2012;13:674-79.  
37  
38  
39 35. Schiller H, Lekander M, Rajaleid K, et al. The impact of reduced worktime on sleep  
40  
41 and perceived stress - a group randomized intervention study using diary data.  
42  
43 *Scand J Work Environ Health* 2017;43:109-16.  
44  
45  
46 36. Dolan P, Kudrna L. More Years, Less Yawns: Fresh Evidence on Tiredness by Age and  
47  
48 Other Factors. *J Gerontology Psychol Sci and Soc Sci* 2013.  
49  
50  
51 37. Sadeh A. The role and validity of actigraphy in sleep medicine: An update. *Sleep*  
52  
53 *Medicine Reviews* 2011;15:259-67.  
54  
55  
56  
57  
58  
59  
60

1  
2  
3  
4  
5  
6  
7  
8  
9  
10  
11  
12  
13  
14  
15  
16  
17  
18  
19  
20  
21  
22  
23  
24  
25  
26  
27  
28  
29  
30  
31  
32  
33  
34  
35  
36  
37  
38  
39  
40  
41  
42  
43  
44  
45  
46  
47  
48  
49  
50  
51  
52  
53  
54  
55  
56  
57  
58  
59  
60

For peer review only

1  
2  
3 **Figure legends**  
4  
5  
6  
7

8 Figure 1. Trajectories of work demands, physical workload, sleep quality, fatigue, sleep  
9 duration weekdays, and sleep duration weekends in three occupational groups. Mean  
10 predicted outcomes at T1 and T5, marginalized over the age and gender distribution at  
11  
12  
13  
14  
15 T1  
16  
17  
18  
19  
20  
21  
22  
23  
24  
25  
26  
27  
28  
29  
30  
31  
32  
33  
34  
35  
36  
37  
38  
39  
40  
41  
42  
43  
44  
45  
46  
47  
48  
49  
50  
51  
52  
53  
54  
55  
56  
57  
58  
59  
60

1  
2  
3  
11  
12  
13  
14  
15  
16  
17  
18  
19  
20

Work demands

BMJ Open

Physical workload

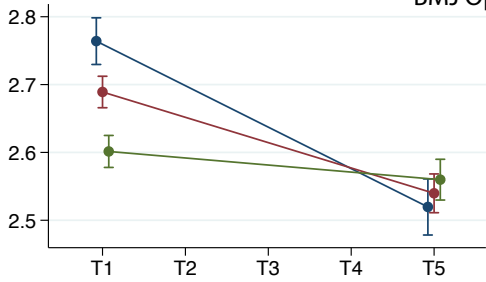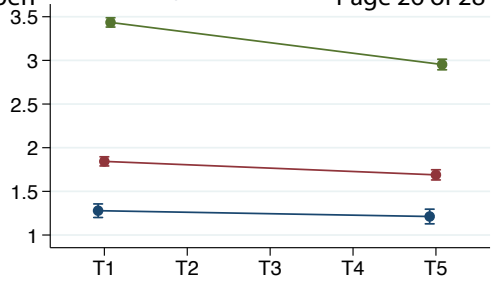

Fatigue

Sleep problems

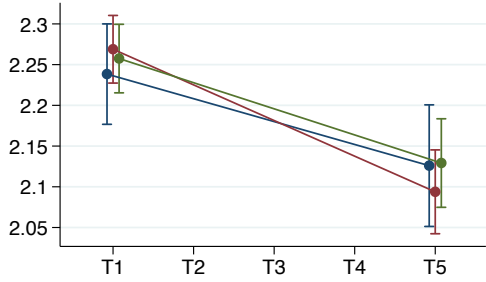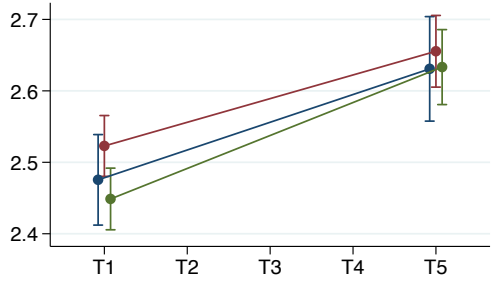

Wave

For peer review only - <http://bmjopen.bmj.com/site/about/guidelines.xhtml>

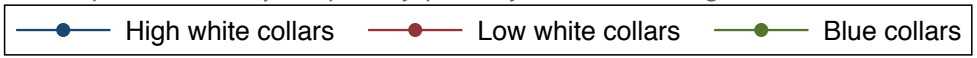

STROBE Statement—Checklist of items that should be included in reports of *cohort studies*

|                              | Item No    | Recommendation                                                                                                                                                                                                                                                                                                                                                                                                |
|------------------------------|------------|---------------------------------------------------------------------------------------------------------------------------------------------------------------------------------------------------------------------------------------------------------------------------------------------------------------------------------------------------------------------------------------------------------------|
| <b>Title and abstract</b>    | <b>1</b>   | (a) Indicate the study's design with a commonly used term in the title or the abstract<br>(b) Provide in the abstract an informative and balanced summary of what was done and what was found                                                                                                                                                                                                                 |
| <b>Introduction</b>          |            |                                                                                                                                                                                                                                                                                                                                                                                                               |
| Background/rationale         | <b>2</b>   | Explain the scientific background and rationale for the investigation being reported                                                                                                                                                                                                                                                                                                                          |
| Objectives                   | <b>3</b>   | State specific objectives, including any prespecified hypotheses                                                                                                                                                                                                                                                                                                                                              |
| <b>Methods</b>               |            |                                                                                                                                                                                                                                                                                                                                                                                                               |
| Study design                 | <b>4</b>   | Present key elements of study design early in the paper                                                                                                                                                                                                                                                                                                                                                       |
| Setting                      | <b>5</b>   | Describe the setting, locations, and relevant dates, including periods of recruitment, exposure, follow-up, and data collection                                                                                                                                                                                                                                                                               |
| Participants                 | <b>6</b>   | (a) Give the eligibility criteria, and the sources and methods of selection of participants. Describe methods of follow-up<br>(b) For matched studies, give matching criteria and number of exposed and unexposed                                                                                                                                                                                             |
| Variables                    | <b>7</b>   | Clearly define all outcomes, exposures, predictors, potential confounders, and effect modifiers. Give diagnostic criteria, if applicable                                                                                                                                                                                                                                                                      |
| Data sources/<br>measurement | <b>8*</b>  | For each variable of interest, give sources of data and details of methods of assessment (measurement). Describe comparability of assessment methods if there is more than one group                                                                                                                                                                                                                          |
| Bias                         | <b>9</b>   | Describe any efforts to address potential sources of bias                                                                                                                                                                                                                                                                                                                                                     |
| Study size                   | <b>10</b>  | Explain how the study size was arrived at                                                                                                                                                                                                                                                                                                                                                                     |
| Quantitative variables       | <b>11</b>  | Explain how quantitative variables were handled in the analyses. If applicable, describe which groupings were chosen and why                                                                                                                                                                                                                                                                                  |
| Statistical methods          | <b>12</b>  | (a) Describe all statistical methods, including those used to control for confounding<br>(b) Describe any methods used to examine subgroups and interactions<br>(c) Explain how missing data were addressed<br>(d) If applicable, explain how loss to follow-up was addressed<br>(e) Describe any sensitivity analyses                                                                                        |
| <b>Results</b>               |            |                                                                                                                                                                                                                                                                                                                                                                                                               |
| Participants                 | <b>13*</b> | (a) Report numbers of individuals at each stage of study—eg numbers potentially eligible, examined for eligibility, confirmed eligible, included in the study, completing follow-up, and analysed<br>(b) Give reasons for non-participation at each stage<br>(c) Consider use of a flow diagram                                                                                                               |
| Descriptive data             | <b>14*</b> | (a) Give characteristics of study participants (eg demographic, clinical, social) and information on exposures and potential confounders<br>(b) Indicate number of participants with missing data for each variable of interest<br>(c) Summarise follow-up time (eg, average and total amount)                                                                                                                |
| Outcome data                 | <b>15*</b> | Report numbers of outcome events or summary measures over time                                                                                                                                                                                                                                                                                                                                                |
| Main results                 | <b>16</b>  | (a) Give unadjusted estimates and, if applicable, confounder-adjusted estimates and their precision (eg, 95% confidence interval). Make clear which confounders were adjusted for and why they were included<br>(b) Report category boundaries when continuous variables were categorized<br>(c) If relevant, consider translating estimates of relative risk into absolute risk for a meaningful time period |

|                    |                          |    |                                                                                                                                                                            |
|--------------------|--------------------------|----|----------------------------------------------------------------------------------------------------------------------------------------------------------------------------|
| 1<br>2<br>3        | Other analyses           | 17 | Report other analyses done—eg analyses of subgroups and interactions, and sensitivity analyses                                                                             |
| 4                  | <b>Discussion</b>        |    |                                                                                                                                                                            |
| 5                  | Key results              | 18 | Summarise key results with reference to study objectives                                                                                                                   |
| 6<br>7             | Limitations              | 19 | Discuss limitations of the study, taking into account sources of potential bias or imprecision. Discuss both direction and magnitude of any potential bias                 |
| 8<br>9<br>10<br>11 | Interpretation           | 20 | Give a cautious overall interpretation of results considering objectives, limitations, multiplicity of analyses, results from similar studies, and other relevant evidence |
| 12                 | Generalisability         | 21 | Discuss the generalisability (external validity) of the study results                                                                                                      |
| 13                 | <b>Other information</b> |    |                                                                                                                                                                            |
| 14<br>15<br>16     | Funding                  | 22 | Give the source of funding and the role of the funders for the present study and, if applicable, for the original study on which the present article is based              |

\*Give information separately for exposed and unexposed groups.

**Note:** An Explanation and Elaboration article discusses each checklist item and gives methodological background and published examples of transparent reporting. The STROBE checklist is best used in conjunction with this article (freely available on the Web sites of PLoS Medicine at <http://www.plosmedicine.org/>, Annals of Internal Medicine at <http://www.annals.org/>, and Epidemiology at <http://www.epidem.com/>). Information on the STROBE Initiative is available at <http://www.strobe-statement.org>.

# BMJ Open

## Psychosocial work demands and physical workload decrease with aging in blue and white-collar workers: A prospective study based on the SLOSH cohort

|                                 |                                                                                                                                                                                                                                                                                                       |
|---------------------------------|-------------------------------------------------------------------------------------------------------------------------------------------------------------------------------------------------------------------------------------------------------------------------------------------------------|
| Journal:                        | <i>BMJ Open</i>                                                                                                                                                                                                                                                                                       |
| Manuscript ID                   | bmjopen-2019-030918.R1                                                                                                                                                                                                                                                                                |
| Article Type:                   | Original research                                                                                                                                                                                                                                                                                     |
| Date Submitted by the Author:   | 10-Jul-2019                                                                                                                                                                                                                                                                                           |
| Complete List of Authors:       | Åkerstedt, Torbjörn; Karolinska Institutet; Stockholm University, Stress Research Institute<br>Discacciati, Andrea; Karolinska Institute, Institute of Environmental Medicine<br>Häbel, Henrike; Karolinska Institutet, Institute of Environmental Medicine<br>Westerlund, Hugo; Stockholm University |
| <b>Primary Subject Heading</b>: | Occupational and environmental medicine                                                                                                                                                                                                                                                               |
| Secondary Subject Heading:      | Epidemiology, Public health                                                                                                                                                                                                                                                                           |
| Keywords:                       | mortality, stress, physical workload, cardiovascular, cancer, shift work                                                                                                                                                                                                                              |
|                                 |                                                                                                                                                                                                                                                                                                       |

SCHOLARONE™  
Manuscripts

1  
2  
3  
4  
5  
6  
7  
8  
9  
10  
11  
12  
13

# Psychosocial work demands and physical workload decrease with aging in blue and white-collar workers: A prospective study based on the SLOSH cohort

14  
15  
16  
17  
18  
19  
20

Torbjörn Åkerstedt<sup>1,2</sup>, Andrea Discacciati<sup>3</sup>, Henrike Häbel<sup>3</sup>, Hugo Westerlund<sup>2</sup>

21  
22  
23  
24  
25

1.Clinical Neuroscience, Karolinska Intsitutet, Stockholm, Sweden

2.Stress Research Institute, Stockholm University, Stockholm. Sweden

3.Institute of Environmental Medicine, Karolinska Institute, Stockholm, Sweden

26  
27  
28  
29  
30

Contact: Torbjörn Åkerstedt, Karolinska Institute, 17771, Stockholm

[torbjorn.akerstedt@ki.se](mailto:torbjorn.akerstedt@ki.se)

Phone: 46 737078928

31  
32  
33  
34  
35  
36  
37  
38  
39  
40  
41  
42  
43  
44  
45  
46  
47  
48  
49  
50  
51  
52  
53  
54  
55  
56  
57  
58  
59  
60

Word count: 4754



## ABSTRACT

### Objectives

Psychosocial work demands and physical workload are important causes of ill health. The dramatic demographic changes in society make it important to understand if such factors change with aging, but this is presently not known. The purpose of the present study was to investigate whether psychosocial work demands and physical workload change across eight years of aging, whether occupational groups show different trajectories of change, and if such trajectories are reflected in sleep or fatigue.

**Methods:** A cohort of 5377 participants (mean age:47.6±11.6(SD) years, 43.2% males, 40.2% blue-collar workers) was measured through self-report in 5 biannual waves across 8 years. Mixed model regression analyses was used to investigate change across aging.

### Results:

Psychosocial work demands decreased significantly across 8 years (Coeff:-0.016±.001), with the strongest decrease in the high white-collar group (Coeff=-0.031±.003), and the oldest group. Physical workload also decreased significantly (Coeff=-0.032±.002), particularly in the blue-collar group (Coeff=-0.050±.004), and in the oldest group. Fatigue decreased, and sleep problems increased with aging, but with similar slopes in the occupational groups. All effect sizes were small, but extrapolation suggests substantial decreases across a working life career.

### Conclusions:

The decrease in psychosocial work demands and physical workload suggests that the burden of work becomes somewhat lighter over 8 years. The mechanism could be “pure” aging and/or increased experience, or related factors. The gradual improvement in the work situation should be considered in the discussion of the place of older individuals in

1  
2  
3 the labor market, and of a suitable age for retirement. The results also mean that  
4  
5 prospective studies of work and health need to consider the improvement in working  
6  
7 life with aging.  
8  
9

10  
11  
12 Key words: work demands, stress, physical workload, fatigue, sleep, aging, occupational  
13  
14 group  
15  
16

### 17 18 19 **Strength and limitations of this study**

- 20  
21 • A strength of this study is the longitudinal approach and relatively large sample size
- 22  
23 • A limitation is the subjective nature of the data, although both main variables are, by  
24  
25 nature, subjective  
26  
27
- 28  
29 • Another limitation is that we can not determine the mechanism behind the decreases  
30  
31 with aging  
32  
33
- 34  
35 • A third limitation is that generalization is difficult beyond the North-Western  
36  
37 European labor market  
38  
39  
40  
41  
42  
43  
44  
45  
46  
47  
48  
49  
50  
51  
52  
53  
54  
55  
56  
57  
58  
59  
60

## 1. INTRODUCTION

Psychosocial work demands are a central factor in research on occupational stress,[1 ,2] that is associated with cardiovascular and other diseases.[3] It involves a need to work fast, to handle difficult tasks or to have too little time for one's tasks. There is also a prospective link between work demands and disturbed sleep,[4-7] and with fatigue.[8 ,9] Sleep problems, in turn, predict a high utilization of health care resources [10] and sickness absence.[11] Fatigue is associated with similar effects.[12-14] The link between psychosocial work demands and health, sleep, and fatigue is usually seen as a stress reaction with increased physiological and mental arousal due to attempts to handle the demands. [3]

Considering the increasing proportion of elderly in society it is an interesting question whether psychosocial work demands increase or decrease with aging. There are no previous studies on this issue, but there is a need to provide knowledge for the discussion of working life sustainability, and the feasibility of a later retirement age. For lack of empirical data one might entertain two hypotheses. Thus, one might assume that aging may lead to more responsibility and, thus, a higher load of psychosocial work demands. Also the opposite could be true, since aging is associated with increased experience, which could increase the capacity to handle demands. The latter may well be perceived as a reduction of demands.

1  
2  
3 If there are changes in psychosocial work demands with aging, the patterns are likely to  
4 be different for blue and white-collar workers. The demands are higher among white-  
5 collar workers and one may speculate that changes with time might be larger in that  
6 group. [15 ,16]  
7  
8  
9  
10  
11  
12

13  
14 Since psychosocial work demands are linked to (poor) sleep and to fatigue, one might  
15 expect these variables to reflect changes in work demands, that is, trajectories across  
16 aging should be correlated. There are no such data available, but we have seen that  
17 fatigue actually decreases with aging, whereas sleep problems increase moderately.[17]  
18  
19 One would also expect trajectories of sleep and fatigue to reflect any differences in  
20 trajectories in psychosocial work demands between occupational groups.  
21  
22  
23  
24  
25  
26  
27  
28  
29  
30

31 Another work related factor that should be considered in connection with psychosocial  
32 work demands is physical workload. It is particularly associated with musculoskeletal  
33 pain, [18 ,19] but also with cardiovascular disease,[20 ,21] as well as with fatigue.[22] It  
34 is, for obvious reasons highest in blue-collar workers. As to effects of aging, the  
35 reasoning is similar to that for psychosocial work demands, but no longitudinal studies  
36 are available. With respect to sleep, one study failed to find a longitudinal association  
37 between physical work demands and sleep, [7] but very little work has been done in this  
38 area. Fatigue, in contrast, is well established as an outcome of physical workload. [23].  
39  
40 One would expect that the trajectories of the two variables are correlated, and that any  
41 differences between occupational groups in physical workload would be reflected in  
42 corresponding differences in fatigue.  
43  
44  
45  
46  
47  
48  
49  
50  
51  
52  
53  
54  
55  
56  
57  
58  
59  
60

1  
2  
3 The purpose of the present study was to investigate whether work demands and  
4 physical workload change across eight years, whether occupational groups show  
5 different trajectories of change, and if such trajectories are reflected in trajectories of  
6 sleep or fatigue. Specific hypotheses are difficult to develop since aging involves reduced  
7 physical and cognitive work capacity, [24] [25] that should be linked to a perception of  
8 increased demands or workload, while increased work experience and career changes  
9 may be counterforces.  
10  
11  
12  
13  
14  
15  
16  
17  
18  
19  
20  
21

## 22 **METHODS**

### 23 24 25 26 **Design and participants**

27  
28  
29  
30  
31 The study was based on the Swedish Longitudinal Occupational Survey of Health,  
32 SLOSH. It is a nationally representative longitudinal cohort survey of at entry (T0)  
33 gainfully employed individuals in the age range of 16–64 years, from the entire country,  
34 stratified by county, sex and citizenship. [26] Participants have been followed up by  
35 postal questionnaires every two years, since 2006. This survey has its origins in the  
36 Swedish Work Environment Survey (SWES, [www.scb.se](http://www.scb.se)), which, in turn, is based on  
37 nationally representative samples of the working population. In the present paper we  
38 use data from waves 1-5 (T1-T5), including only individuals employed at the start of  
39 follow-up (T1), and with available information on occupational group (from T2). This  
40 resulted in 5377 participants.  
41  
42  
43  
44  
45  
46  
47  
48  
49  
50  
51  
52  
53  
54  
55  
56

57 The sample at T1 contained 43.2% males; 33.9% 18-42 year olds, 42.1% 43-56 year  
58 olds, and 24.1 % 57-68 year olds; 55.3% married; 53.4% with children (living at home);  
59  
60

1  
2  
3 80.2% in very or rather good health. Mean age  $\pm$  SD was 47.6 $\pm$ 11.6 years; 3.5% were not  
4  
5 working. The latter were removed from the analyses.  
6  
7  
8  
9

## 10 **Variables**

11  
12  
13  
14

15 Information regarding gender, age and occupational category (blue-collar worker,  
16 white-collar workers, and managers), were derived from self-report at T2. The  
17 occupational categories are based on the Statistics Sweden official classification of  
18 occupations (SSYK) to produce the categories blue-collar workers (BCW), lower white  
19 collar workers (LWC) and professionals and managers (HWC - high white-collar  
20 workers). The N for the three groups was 2163, 2226, and 988, respectively.  
21  
22  
23  
24  
25  
26  
27  
28  
29  
30

31 Work demands were measured using the Swedish version of the Demand-Control-  
32 Support Questionnaire.[1] This scale has been extensively psychometrically  
33 investigated, [2 ,27] and used to predict health outcomes of psychosocial work  
34 factors.[28 ,29] The five items used were: "Do you have to work very intensively?" "Does  
35 your work demand too much effort?" "Do you have enough time to do everything?"  
36 (reverse coded), "Do you have to work very fast?" and "Does your work often involve  
37 conflicting demands?". The response alternatives ranged from 1: Hardly ever/never, to  
38 4: Yes, often (scaled reversed from the original 4-1). Cronbach's  $\alpha$  was 0.67 at T3.  
39  
40  
41  
42  
43  
44  
45  
46  
47  
48  
49  
50  
51

52 Four items representing disturbed sleep were selected from the Karolinska Sleep  
53 Questionnaire (KSQ) (Cronbach's alpha > 0.70).[5 ,30-32] The scale differentiates  
54 patients with insomnia from healthy individuals [31], and correlates with perceived  
55 stress, anxiety, depression and burnout ( $r > .40$ ).[32] The items included are: difficulties  
56  
57  
58  
59  
60

1  
2  
3 falling asleep, restless sleep, repeated awakenings, and premature awakening. The  
4 responses range from “never” to “most days of the week” (1-6). Cronbach’s alpha was  
5  
6 0.84 at time T3, and the correlation between time points was  $r = .71$ .  
7  
8

9  
10  
11 Ratings of fatigue were obtained from a single item phrased as “to what extent have you  
12 been suffering from sluggishness or lack of energy”, with response alternatives from 1  
13 (not at all) to 5 (very much). It is significantly correlated ( $r = 0.60, p < .001$ ) with  
14  
15 persistent fatigue and mental fatigue ( $r = 0.57, p < .001$ ) at T3.  
16  
17  
18  
19  
20  
21  
22

23 Physical workload was measured as an index of three questions: “Is your work such that  
24 you have to use bent, twisted or otherwise unsuitable positions?” “Do you have to lift at  
25 least 15 kilos several times a day?” “Does your work sometimes involve heavy physical  
26 labor, that is, do you physically exert yourself more than when walking and standing and  
27 moving around in a normal way?”. Response alternatives ranged from 1: No, not at all, to  
28  
29 6: Almost all the time. Cronbach’s  $\alpha$  was 0.89 for at T1, and the test-retest reliability  
30  
31 between T1 and T2 was  $r = .85$ .  
32  
33  
34  
35  
36  
37  
38  
39  
40

## 41 **Statistical analysis**

42  
43  
44  
45  
46 To describe the mean trajectories of the outcomes over time (waves T1 – T5) for  
47 different occupational groups we used mixed-effects linear regression models.[33]  
48  
49 Regression models included occupational group (level-2 variable), individual (across  
50 time) (level-1 variable) and their two interaction (product) terms as fixed effects.  
51  
52 Moreover, they included subject-specific random intercept and time slope to account for  
53  
54 potential dependence among repeated values of the outcome variables over time. The  
55  
56  
57  
58  
59  
60

1  
2  
3 analyses were adjusted for gender and age (level-2 variables). The overall difference in  
4 the slopes over time across the three occupational groups was assessed with a joint  
5  
6 Wald test with 2 degrees of freedom on the 2 interaction terms. Waves when an  
7  
8 individual was not employed were not used in the analyses. Effect size was computed as  
9  
10 the coefficient of the slope divided by the [within-subject standard deviation](#), as  
11  
12 suggested in <https://www.ncbi.nlm.nih.gov/pmc/articles/PMC3743548/#FD8>  
13  
14  
15  
16  
17  
18

19 -In a second analysis, the subject-specific time slopes for work demands and physical  
20 workload were used as predictors for the other outcomes. More specifically, we first  
21 modeled work demands and physical workload using 2 mixed-effects linear regression  
22 models. These models included time as fixed effect with random intercept and slope. We  
23 then calculated subject-specific slopes by adding to the fixed-effects time coefficient the  
24 subject-specific best linear unbiased predictions (BLUPs) of the random slope. Finally,  
25 we used the subject-specific slopes as a fixed-effect in a separate mixed-effects linear  
26 regression model, adjusted for age and gender, with random intercept and random time  
27 slope.  
28  
29  
30  
31  
32  
33  
34  
35  
36  
37  
38  
39  
40  
41  
42

43 In a third analysis, we described the age group-specific mean trajectories of the  
44 outcomes over time. This was done in an analogous fashion to what we described for the  
45 main analysis. Age groups were defined as: 18-42, 43-56, and 57-68 years of age. This  
46 was also repeated with stratification within each occupational group.  
47  
48  
49  
50  
51  
52  
53

#### 54 **Patient and public involvement statement**

55  
56  
57  
58  
59 Patients were not involved in the present study  
60



## Results

The mean values and standard deviation at T1 for the four main variables were: 2.67±.58 for psychosocial work demands, 2.38±1.56 for physical workload, 2.47±1.06 for sleep problems, and 2.26±1.09 for fatigue. Medians for the four variables were: 2.75, 1.67, 2.25, and 2.00, respectively.

Figure 1 and Table 1 show the effects of aging on self reported work demands. The decrease across time was significant for the total sample, and for each group separately. For reference, the decrease in the total sample, represented by the coefficient -0.016, corresponds to a change of -0.08 units on the 1-4 unit scale across 8 years. The interaction between the occupational groups was highly significant, that is, the three groups showed different slopes over time, with the largest slope (and effect size) for HWC, for which the coefficient -0.031 corresponds to -0.15 units on a 1-6 point scale across 8 years.

In addition, BCW showed (at T3) lower demands than HWC ( $0.06 \pm 0.02$ ,  $Z=3.2$ ,  $p=.000$ ), but LWC did not ( $-0.03 \pm 0.02$ ,  $Z=1.5$ ,  $p=.147$ ). Women showed higher values (higher demands) than men ( $0.05 \pm 0.01$ ,  $Z=3.5$ ,  $p=.000$ ). The oldest group showed significantly lower work demands ( $0.14 \pm 0.02$ ,  $Z=7.8$ ,  $p=.000$ ) than the youngest group, but the intermediate group did not ( $0.02 \pm 0.01$ ,  $Z= 1.4$ ,  $p=.147$ ).

1  
2  
3 Figure 1 shows the effects of aging on physical workload in the three occupational  
4 groups. Table 1 shows that the decrease in workload was significant for the total sample.  
5  
6 The coefficient for the total sample (-0.033) corresponds to a decrease of -0.16 units  
7  
8 (scale=1-6) across the 8 years. The interaction between groups was highly significant,  
9  
10 with the largest coefficient (and effect size) for BCW (-0.05 units across the 5 waves),  
11  
12 corresponding to a decrease of 0.25 units across the 8 years.  
13  
14  
15  
16  
17  
18

19 BCW showed (at T3) a significantly higher physical workload than HWC ( $1.948 \pm 0.044$ ,  
20  
21  $Z=44.5$ ,  $p=.000$ ), which also LWC did ( $0.521 \pm 0.044$ ,  $Z=11.9$ ,  $p=.000$ ). Women showed  
22  
23 higher physical workload than men ( $0.145 \pm 0.032$ ,  $Z=4.6$ ,  $p=.000$ ). The oldest group  
24  
25 showed significantly lower physical load ( $0.115 \pm 0.041$ ,  $Z=2.8$ ,  $p=.006$ ) than the youngest  
26  
27 group.  
28  
29  
30  
31  
32

33 Figure 1 shows the effect of aging on fatigue in the three occupational groups. Table 1  
34  
35 shows that the reduction in fatigue was significant for the total group and each  
36  
37 occupational group. The interaction was not significant and the level between groups  
38  
39 did not differ significantly. However, at T3 women had a significantly higher level of  
40  
41 fatigue ( $0.25 \pm 0.02$ ,  $Z=10.4$ ,  $p=.000$ ). In addition, older individuals showed significantly  
42  
43 less fatigue ( $-0.37 \pm 0.03$ ,  $Z=11.7$ ,  $p=.000$ ) than the young group. The intermediate age  
44  
45 group also showed lower fatigue ( $-0.16 \pm 0.03$ ,  $Z=5.9$ ,  $p=.000$ }).  
46  
47  
48  
49  
50  
51

52 Figure 1 shows the effects of aging on sleep problems in the three occupational groups.  
53  
54 Table 1 shows that the increase in sleep problems was significant for the total group, as  
55  
56 well as in all three occupational groups. The interaction was not significant and the level  
57  
58 between groups did not differ significantly. At T3 Women reported more sleep problems  
59  
60

than men ( $0.28 \pm .03$ ,  $Z=10.8$ ,  $p=.000$ ). The oldest individuals reported more sleep problems than the young ( $0.07 \pm .03$ ,  $Z=2.17$ ,  $p=.03$ ); as did the intermediate group  $0.17 \pm .03$  ( $Z=5.9$ ,  $p=.000$ ).

As a sensitivity analysis we repeated the previous analyses for those participants who had complete data for all five waves ( $N=1888$ ). The results were very similar to the previous results. The only difference was that the significant decrease in work demands for blue collar workers ( $p<.05$ ) and the significant decrease in fatigue for high white-collar workers ( $p<.05$ ) did not remain significant.

Figure 1

Table 1. Slopes of the different occupational groups for each variable. Coefficients of slope, standard error, Z-value, p-value. Chi2 value for interaction, and effect sizes.  $N=5377$

| Occup groups     | Coeff±se            | Z                 | Eff  |  | Coeff±se                 | Z                 | Eff  |
|------------------|---------------------|-------------------|------|--|--------------------------|-------------------|------|
|                  |                     | Chi2              | size |  |                          | Chi2              | size |
|                  | <b>Work demands</b> | .                 |      |  | <b>Physical workload</b> |                   |      |
| All              | -0.016±.001         | 12.2 <sup>c</sup> | .043 |  | -0.033±.002              | 14.3 <sup>c</sup> | .057 |
| HWC              | -0.031±.003         | 10.6 <sup>c</sup> | .084 |  | -0.008±.005              | 1.7               | .014 |
| LWC              | -0.029±.002         | 9.4 <sup>c</sup>  | .078 |  | -0.019±.003              | 5.5 <sup>c</sup>  | .033 |
| BCW              | -0.005±.002         | 2.5 <sup>a</sup>  | .014 |  | -0.050±.004              | 16.3 <sup>c</sup> | .087 |
| Interaction Chi2 |                     | 53.5 <sup>c</sup> |      |  |                          | 94.0 <sup>c</sup> |      |
|                  | <b>Fatigue_rec</b>  |                   |      |  | <b>Sleep problems</b>    |                   |      |
| All,             | -0.018±.002         | 7.5 <sup>c</sup>  | .022 |  | 0.020±.002               | 9.4 <sup>c</sup>  | .033 |
| HWC              | -0.014±.005         | 2.6 <sup>a</sup>  | .017 |  | 0.019±.005               | 4.2 <sup>a</sup>  | .032 |
| LWC              | -0.022±.004         | 5.9 <sup>c</sup>  | .027 |  | 0.017±.003               | 5.2 <sup>c</sup>  | .028 |
| BCW              | -0.016±.004         | 4.1 <sup>a</sup>  | .020 |  | 0.023±.003               | 6.8 <sup>c</sup>  | .038 |
| Interaction Chi2 |                     | 1.9               |      |  |                          | 2.0               |      |

Results are adjusted for age and gender. HWC=high white-collar workers, LWC=low white-collar workers, BCW=Blue collar workers. a= $p<.05$ , b= $p<.01$ , c= $p<.001$

To test the direct association of changes between work demands and the other variables we used a mixed model regression and computed the relation between the individual slopes in work demands and in the other variables. Table 2 shows significant positive regression coefficients for all analyses. Note that the regression is computed between

subject-specific *slopes*. Thus, the positive regression coefficient between psychosocial work demands and sleep problems means that steep decreases in work demands (constituting negative values of the slope for that variable) are associated with decreases, or low increases, in sleep problems (low values of the slope for that variable). Positive regression coefficients were seen also between physical workload and fatigue.

Table 2. The regression of the slopes of work demands and physical workload vs the slopes of fatigue and sleep problems. Mixed model regression

| Work demand slope vs slope of: | Work demands vs Coeff±se | Z    | p    | Physical workload vs Coeff±se | Z   | p    |
|--------------------------------|--------------------------|------|------|-------------------------------|-----|------|
| Phys worklad                   | 0.204±.031               | 6.5  | .000 |                               |     |      |
| Fatigue                        | 0.106±.010               | 10.9 | .000 | 0.010±.004                    | 2.4 | .018 |
| Sleep problems                 | 0.243±.022               | 11.1 | .000 | 0.028±.010                    | 2.9 | .004 |

Adjusted for age and gender. Z=Z value, p=significance level. a=p<.05, b=p<.01, c=p<.001

Since there is a possibility that the change across time in the main analysis might be different in different age groups we also analyzed the trajectories within three age groups – 18-42 years, 42-56 years, and 57-68 years, adjusted for gender. Table 3 shows a strong interaction between work demands and age groups, with the largest decrease (and effect size) in the oldest group, although all three trajectories were significant. For physical workload, the trajectories of each age group was significant, but the interaction was not.

There was a similar pattern for fatigue and sleep problems. In both cases the interaction was significant. For fatigue the oldest group showed the strongest decrease (and effect size), whereas for sleep problems the youngest group showed the strongest increase (and effect size), while the oldest group showed a significant *decrease*. In all cases the decrease was largest in the oldest group. For sleep problems, the interaction between age groups was significant, but here the oldest group had the smallest decrease.

The same analysis subdivided on occupational group showed similar results. For work demands the interaction between time and age group was significant in all three occupational groups and the decrease strongest in the oldest group. For physical work demands no significant interactions were obtained. For fatigue the interaction was significant in the LWC and BWC groups, with the strongest decrease in the oldest group. For sleep problems all three occupational groups showed significant interactions, with the lowest increase in the oldest group.

Table 3. Trajectories across 8 years of work demands, physical Workload, fatigue, and sleep problems for 3 age groups for the full group and for each occupational group, adjusted for gender.

| Age groups,<br>All participants | Coeff±se            | Z<br>Chi2         | Effect<br>size | Coeff±se                 | Z<br>Chi2         | Effect<br>size |
|---------------------------------|---------------------|-------------------|----------------|--------------------------|-------------------|----------------|
|                                 | <b>Work demands</b> |                   |                | <b>Physical workload</b> |                   |                |
| 18-42 yrs                       | -0.006±.002         | 3.0 <sup>b</sup>  | .016           | -0.038±.004              | 9.6 <sup>c</sup>  | .063           |
| 43-56 yrs                       | -0.017±.002         | 9.1 <sup>c</sup>  | .048           | -0.033±.003              | 10.2 <sup>c</sup> | .053           |
| 57-68 yrs                       | -0.039±.004         | 10.6 <sup>a</sup> | .105           | -0.028±.006              | 5.1 <sup>c</sup>  | .048           |
| <b>Interaction Chi2</b>         |                     | 61.1 <sup>c</sup> |                |                          | 1.9               |                |
|                                 | <b>Fatigue</b>      |                   |                | <b>Sleep problems</b>    |                   |                |
| 18-42 yrs                       | -0.014±.004         | 3.3 <sup>c</sup>  | .025           | 0.028±.003               | 8.0 <sup>c</sup>  | .044           |
| 43-56 yrs                       | -0.014±.003         | 4.0 <sup>c</sup>  | .018           | 0.023±.003               | 7.7 <sup>c</sup>  | .039           |
| 57-68 yrs                       | -0.044±.006         | 7.7 <sup>c</sup>  | .059           | -0.011±.005              | 2.3 <sup>a</sup>  | .019           |
| <b>Interaction Chi2</b>         |                     | 20.3 <sup>c</sup> |                |                          | 39.5 <sup>c</sup> |                |
|                                 | <b>Work demands</b> |                   |                | <b>Physical workload</b> |                   |                |
| <b>HWC</b>                      |                     |                   |                |                          |                   |                |
| <b>Age groups</b>               |                     |                   |                |                          |                   |                |
| 18-42 yrs                       | -0.018±.004         | 4.9 <sup>c</sup>  | .050           | -0.012±.004              | 3.0 <sup>b</sup>  | .039           |
| 43-56 yrs                       | -0.033±.003         | 7.8 <sup>c</sup>  | .091           | -0.007±.003              | 2.4 <sup>b</sup>  | .027           |
| 57-68 yrs                       | -0.055±.008         | 6.6 <sup>c</sup>  | .146           | -0.003±.006              | 0.4               | .009           |
| <b>Interaction Chi2</b>         |                     | 19.5 <sup>c</sup> |                |                          | 2.1               |                |
| <b>LWC</b>                      |                     |                   |                |                          |                   |                |
| <b>Age groups</b>               |                     |                   |                |                          |                   |                |
| 18-42 yrs                       | -0.006±.003         | 1.7               | .002           | -0.023±.006              | 4.1 <sup>c</sup>  | .043           |
| 43-56 yrs                       | -0.021±.003         | 7.7 <sup>c</sup>  | .058           | -0.018±.005              | 3.9 <sup>c</sup>  | .038           |
| 57-68 yrs                       | -0.040±.005         | 7.4 <sup>c</sup>  | .107           | -0.019±.008              | 2.5 <sup>a</sup>  | .040           |
| <b>Interaction Chi2</b>         |                     | 33.3 <sup>c</sup> |                |                          | 0.7               |                |
| <b>BCW</b>                      |                     |                   |                |                          |                   |                |
| <b>Age groups</b>               |                     |                   |                |                          |                   |                |
| 18-42 yrs                       | -0.001±.003         | 0.3               | .003           | -0.065±.008              | 8.0 <sup>c</sup>  | .006           |
| 43-56 yrs                       | -0.004±.003         | 1.3               | .012           | -0.058±.006              | 9.1 <sup>c</sup>  | .080           |
| 57-68 yrs                       | -0.024±.006         | 4.1 <sup>c</sup>  | .066           | -0.051±.013              | 3.9 <sup>c</sup>  | .066           |

| Interaction Chi2 |             | 11.9 <sup>c</sup> |      |                | 1.0               |      |
|------------------|-------------|-------------------|------|----------------|-------------------|------|
|                  | Fatigue     |                   |      | Sleep problems |                   |      |
| <b>HWC</b>       |             |                   |      |                |                   |      |
| Age group        |             |                   |      |                |                   |      |
| 18-42 yrs        | -0.017±.009 | 1.9               | .019 | 0.017±.007     | 2.4 <sup>c</sup>  | .028 |
| 43-56 yrs        | -0.008±.007 | 1.0               | .010 | 0.029±.007     | 4.1 <sup>c</sup>  | .054 |
| 57-68 yrs        | -0.025±.012 | 2.1 <sup>a</sup>  | .034 | -0.025±.012    | 2.1               | .006 |
| Interaction Chi2 |             | 1.5               |      |                | 6.2 <sup>a</sup>  |      |
| <b>LWC</b>       |             |                   |      |                |                   |      |
| Age groups       |             |                   |      |                |                   |      |
| 18-42 yrs        | -0.016±.007 | 2.4 <sup>a</sup>  | .018 | 0.027±.005     | 5.1 <sup>c</sup>  | .041 |
| 43-56 yrs        | -0.017±.006 | 3.0 <sup>b</sup>  | .022 | 0.020±.005     | 4.3 <sup>c</sup>  | .033 |
| 57-68 yrs        | -0.051±.009 | 5.7 <sup>c</sup>  | .087 | -0.015±.007    | 2.0 <sup>a</sup>  | .026 |
| Interaction Chi2 |             | 10.6 <sup>b</sup> |      |                | 20.6 <sup>c</sup> |      |
| <b>BCW</b>       |             |                   |      |                |                   |      |
| Age groups       |             |                   |      |                |                   |      |
| 18-42 yrs        | -0.009±.007 | 1.4               | .011 | 0.033±.006     | 5.7 <sup>c</sup>  | .053 |
| 43-56 yrs        | -0.014±.005 | 2.5 <sup>a</sup>  | .018 | 0.024±.005     | 5.8 <sup>c</sup>  | .038 |
| 57-68 yrs        | -0.047±.010 | 4.0 <sup>c</sup>  | .063 | -0.012±.008    | 1.4               | .021 |
| Interaction Chi2 |             | 10.6 <sup>b</sup> |      |                | 16.4 <sup>c</sup> |      |

HWC=high white collar workers, LWC=low white collar workers, BCW=Blue collar workers  
a=p<.05, b=p<.01, c=p<.001

## Discussion

Work demands decreased significantly within individuals over time in all three occupational groups, but also the interaction was highly significant. The steepest decrease was seen in HWC. The latter group also showed the overall highest level of work demands. Physical workload showed a decrease for the BCW and LWC groups and a significant interaction across occupational groups, with BCW showing the highest mean level. The changes in both variables were strongest in the oldest group. Sleep problems increased and fatigue decreased in all three occupational groups, but there was no interaction between groups. There was also a significant association between the decreased work demands and sleep and fatigue variables. For physical workload the associations were weaker.

1  
2  
3 The effect size of the decrease in psychosocial work demands is relatively small.  
4  
5 However, considering the change across a working life career of 40 years, the decrease  
6  
7 corresponds to a reduction of 0.4 units for the total group, and 0.75 for HWC. This  
8  
9 represents 2/3 of the standard deviation of the present sample. The implications of such  
10  
11 a change are not straightforward to evaluate since most studies of psychosocial work  
12  
13 demands seldom report scale values in relation to health. They rather present results  
14  
15 after dichotomization of scale values into high and low demands. The dichotomization is  
16  
17 usually made at the median or highest quartile to identify “high” demands. However, in a  
18  
19 study of psychosocial work demands and musculoskeletal problems scale values were  
20  
21 presented (mean±SD = 2.42±.54 units) with a cut-off for high demands at the 67<sup>th</sup>  
22  
23 percentile = 3.04 units, and with intermediate level (median) cut-off at 2.40 units. Thus,  
24  
25 using our results, a person at an intermediate level of demands (≈2.72) would be  
26  
27 expected to change into the low demand category (at 2.32 units) from the beginning to  
28  
29 the end of working life, as long as the extrapolation of the eight-years coefficients may  
30  
31 be assumed to be linear. WCW would be expected to change about twice as much. Thus,  
32  
33 it seems that the decrease in psychosocial work demands with age/experience should  
34  
35 have practical implications, particularly for high white-collar workers.  
36  
37  
38  
39  
40  
41  
42  
43  
44

45 The improvement in work demands across time should be a positive finding for  
46  
47 individuals in situations with high psychosocial work demands. The results should have  
48  
49 implications for discussions of a sustainable working life and of a reasonable retirement  
50  
51 age. In addition, the results have implications for the interpretation of results of  
52  
53 prospective research studies, since a long follow-up time would mean a lower exposure  
54  
55 to work demands across time, leading to a likely attenuation of the effects of high work  
56  
57 demand levels on later disease outcomes.  
58  
59  
60

1  
2  
3  
4  
5 We are not able to determine the reason for the decrease in work demands, but it is  
6 likely that increased experience with aging makes the individual more competent at  
7 handling work tasks. Aging was also associated with reduction in fatigue, which might  
8 contribute. It is also likely that the possibility to step down increases with increasing  
9 age, and career motives may become less salient; both may reduce perceived  
10 psychosocial work demands. The suggested causes discussed here clearly need  
11 increased research efforts.  
12  
13  
14  
15  
16  
17  
18  
19  
20  
21  
22  
23

24 The difference in steepness in the decrease of work demands in the three occupational  
25 groups could possibly be interpreted as differences in the positive effects of work  
26 experience. Professional groups and managers usually have more complex work tasks  
27 for which experience may have more dramatic effects on mastery than what may be the  
28 cases for blue-collar workers. In addition, professional groups may have better  
29 possibilities to step down from responsibilities than workers. Again, these notions need  
30 further research.  
31  
32  
33  
34  
35  
36  
37  
38  
39  
40  
41  
42

43 The decrease in physical workload also seems to be a new finding, and we lack data to  
44 compare with. Even if the effect size was modest, one might, again, consider the size of  
45 the decrease across 40 years of work, which amounts to approximately 0.8 units, if  
46 linear extrapolation is permissible. One might compare this with results from a study  
47 using the same items for physical load to predict lower back pain [34]. This study set  
48 values of 1-3 as “no exposure”, 4 as intermediate, and 5+6 as high exposure (with  
49 significant prediction of back pain for both exposed groups). A decrease of 0.8 units  
50 across a working life career would then bring many highly exposed individuals into the  
51  
52  
53  
54  
55  
56  
57  
58  
59  
60



1  
2  
3 intermediate exposure category, and those with intermediate exposure into the  
4 unexposed category. Thus, the estimated reduction in physical workload across a  
5  
6 working life career appears considerable.  
7  
8  
9

10  
11  
12 The difference in steepness in the decrease of physical workload in the three  
13 occupational groups probably partly reflects the fact that most white-collar workers  
14  
15 have low levels of physical workload from the start. As with the decrease in psychosocial  
16  
17 work demands in HWC, one could speculate that experience may increase the physical  
18  
19 capacity and perhaps the skill to handle physical workload in BCW. One might also  
20  
21 conceive of experience leading to a move to work tasks with less physical load. These  
22  
23 lines of reasoning are speculation, however, and there is a need for studies on how age  
24  
25 itself, experience at work, move to another job, improvement in work tasks, and similar  
26  
27 factors lead to a perception of a reduced physical workload. Note that the coefficient for  
28  
29 BCW is approximately 50% larger than that of the total group. This suggests that the  
30  
31 decrease across a working life career should have implications for the ability to sustain a  
32  
33 long working life for blue-collar workers.  
34  
35  
36  
37  
38  
39  
40  
41  
42

43 As expected, the individual slopes of the decrease in work demands were associated  
44  
45 with a decrease in fatigue, as well as a lower increase in sleep problems (or even a  
46  
47 decrease). This is in line with the day-to-day association between the three variables in a  
48  
49 diary study across 42 days,[35] and strengthens the notion of a link between work  
50  
51 demands and sleep quality, as well as with fatigue.  
52  
53  
54  
55

56  
57 The similar slope of sleep problems and fatigue for all occupational groups failed to  
58  
59 reflect the different trajectories for psychosocial work demands and physical workload  
60

1  
2  
3 for those groups. This was unexpected, particularly since at least psychosocial work  
4 demands have been linked to fatigue and sleep problems in previous studies,[17 ,36],  
5  
6 and since the present data (table 2) shows clear associations between work demands  
7  
8 and sleep problems on the individual level.  
9  
10

11  
12  
13  
14  
15 The age-related difference in trajectories of the decrease in work demands does not  
16  
17 have an obvious explanation. All participants were still employed at the last point of  
18  
19 measurement, so formal retirement does not seem to be implicated as a cause. However,  
20  
21 work hours could have been reduced, which is in line with the decrease being largest in  
22  
23 the oldest group, and reduced work hours are associated with reduced demands.[37]  
24

25  
26 We lack specific information on work hours in the present study, however. The fact that  
27  
28 the reduction of psychosocial work demands in the present study was significant also in  
29  
30 the middle age group suggests that reduced work hours should not have been the only  
31  
32 cause, since part-time work is unusual in that group. This is also supported by the  
33  
34 significant decrease also in the youngest group. Another, probably important, factor  
35  
36 should be the effect of experience on the ability to handle work demands, and possibly,  
37  
38 also the effect of promotion to positions with more control over the work situation.  
39  
40

41  
42 Furthermore, loss of, particularly physical work capacity, might result in transfer to less  
43  
44 demanding work tasks. However, the present study did not contain variables that make  
45  
46 it possible to judge effects of increased experience, promotion or change of work tasks.  
47  
48  
49  
50

51  
52 The reduction of fatigue with time agrees with findings of lower fatigue in older  
53  
54 individuals.[38] The observation that the effect was largest in the oldest group is a new  
55  
56 observation, but the mechanism may be the same as discussed for work demands above.  
57  
58 Sleep problems showed a similar trajectory as fatigue, although here the oldest group  
59  
60

1  
2  
3 lacked the impairment over time over time that the younger groups had. Previous work  
4 has consistently found sleep problems to increase with age, but there is no previous data  
5 on the lack of increase in sleep problems in older individuals across time, except for our  
6 own previous study on the same material.[17] The same factors as discussed above may  
7 be invoked also in this case, but there may also be effects of biological aging.  
8  
9

10  
11  
12 The decrease of psychosocial work demands and physical workload across time leaves a  
13 positive impression of the aging process in working life. Work appears to become easier  
14 with time. The observation that the effect is largest in the oldest groups indicates that  
15 from this point of view working life is sustainable. It also indicates that a temporal  
16 extension of working life could well be acceptable to many individuals, at least those still  
17 in good health. This is further accentuated by the reduction of fatigue with time. It is an  
18 interesting question for future work to determine if the observed improvement in  
19 psychosocial work demands and physical workload also leads to improved productivity.  
20  
21  
22  
23  
24  
25  
26  
27  
28  
29  
30  
31  
32  
33  
34  
35  
36  
37

38 There are some limitations to the present study. Firstly, all data are subjective, but this  
39 is difficult to avoid since objective measures of the variables is difficult with > 5000  
40 participants. Another limitation is that there was a substantial loss of participants  
41 across time, possibly indicating a healthy worker effect. However, an analysis of the  
42 completers did not change the results appreciably. Among the drop-outs there are  
43 probably individuals who died. This would have been interesting information to analyze,  
44 but unfortunately we did not have access to such data. With the present analysis we  
45 cannot draw any conclusions regarding causation, but that was not the purpose of the  
46 study. Rather, the purpose was to study whether aging or time at work would affect  
47 work demands, and that steered the analysis towards the approach of evaluating slopes  
48  
49  
50  
51  
52  
53  
54  
55  
56  
57  
58  
59  
60

1  
2  
3 over time. The strength of the study is the longitudinal approach, which makes it  
4  
5 possible to evaluate the effects of time.  
6  
7  
8  
9

## 10 Conclusion:

11  
12  
13  
14  
15 The results indicate that psychosocial work demands and physical workload decrease  
16  
17 with time, which may have implications for discussions of a sustainable working life and  
18  
19 of a temporal extension of working life. The study has some limitations and there is need  
20  
21 for replication in studies with objective measures.  
22  
23  
24  
25

26 The Regional Research Ethics Board in Stockholm approved this study.

27  
28  
29 A.TÅ defined the research question, designed the study and wrote the draft. AD analyzed  
30  
31 the data and commented on the manuscript. HW provided the cohort and commented on  
32  
33 the manuscript. HH provided statistical advice and commented on the manuscript.  
34  
35

36 B.No conflicts of interest have been reported.

37  
38 C.This work was supported by the AFA Insurance Company.

39  
40  
41 D.A strategy for data access has been developed, which strives to make SLOSH data as  
42  
43 accessible as possible while satisfying legal requirements and ethical principles as well  
44  
45 as protecting the personal privacy of the participants. Requests for data for specific  
46  
47 research projects or collaborations can be addressed to [data@slosh.se].  
48  
49  
50  
51  
52

## 53 References

54  
55  
56  
57  
58  
59  
60

- 1  
2  
3 1. Theorell T, Perski A, Åkerstedt T, et al. Changes in job strain in relation to changes in  
4  
5 physiological state. *Scandinavian Journal of Work, Environment and Health*  
6  
7 1988;14:189-96.  
8  
9
- 10 2. Fransson E, Nyberg S, Heikkilä K, et al. Comparison of alternative versions of the job  
11  
12 demand-control scales in 17 European cohort studies: the IPD-Work consortium.  
13  
14 *BMC Public Health* 2012;12:62.  
15  
16
- 17 3. Kivimaki M, Steptoe A. Effects of stress on the development and progression of  
18  
19 cardiovascular disease. *Nature Reviews Cardiology* 2017.  
20  
21
- 22 4. de Lange AH, Kompier MA, Taris TW, et al. A hard day's night: a longitudinal study on  
23  
24 the relationships among job demands and job control, sleep quality and fatigue.  
25  
26 *Journal of sleep research* 2009;18:374-83.  
27  
28
- 29 5. Akerstedt T, Nordin M, Alfredsson L, et al. Predicting changes in sleep complaints from  
30  
31 baseline values and changes in work demands, work control, and work  
32  
33 preoccupation--the WOLF-project. *Sleep Medicine* 2012;13:73-80.  
34  
35
- 36 6. Magnusson Hanson LL, Akerstedt T, Naswall K, et al. Cross-lagged relationships  
37  
38 between workplace demands, control, support and sleep problems. *Sleep*  
39  
40 2011;34:1403-10.  
41  
42
- 43 7. Akerstedt T, Garefelt J, Richter A, et al. Work and Sleep--A Prospective Study of  
44  
45 Psychosocial Work Factors, Physical Work Factors, and Work Scheduling. *Sleep*  
46  
47 2015;38:1129-36.  
48  
49
- 50 8. Maslach C, Leiter MP. Stress and burnout: The critical research. In: Cooper CL, ed.  
51  
52 Handbook of stress medicine and health. Lancaster, UK: CRC Press, 2005:155-72.  
53  
54
- 55 9. Avlund K. Fatigue in older adults: an early indicator of the aging process? *Aging*  
56  
57 *Clinical and Experimental Research* 2010;22:100-15.  
58  
59  
60

- 1  
2  
3 10. Kuppermann M, Lubeck DP, Mazonson PD, et al. Sleep problems and their correlates  
4  
5 in a working population. *Journal of General Internal Medicine* 1995;10:25-32.  
6  
7
- 8 11. Lallukka T, Haaramo P, Rahkonen O, et al. Joint associations of sleep duration and  
9  
10 insomnia symptoms with subsequent sickness absence: the Helsinki Health  
11  
12 Study. *Scandinavian Journal of Public Health* 2013;41:516-23.  
13  
14
- 15 12. Watt T, Gronenvold M, Bjorner JB, et al. Fatigue in the Danish general population.  
16  
17 Influence of sociodemographic factors and disease. *Journal of Epidemiology and*  
18  
19 *Community Health* 2000;54:827-33.  
20  
21
- 22 13. Janssen N, Kant IJ, Swaen GM, et al. Fatigue as a predictor of sickness absence: results  
23  
24 from the Maastricht cohort study on fatigue at work. *Occupational and*  
25  
26 *Environmental Medicine* 2003;60 Suppl 1:i71-6.  
27  
28
- 29 14. Akerstedt T, Kecklund G, Alfredsson L, et al. Predicting long-term sickness absence  
30  
31 from sleep and fatigue. *Journal of sleep research* 2007;16:341-5.  
32  
33
- 34 15. Hallqvist J, Diderichsen F, Theorell T, et al. Is the effect of job strain on myocardial  
35  
36 infarction risk due to interaction between high psychological demands and low  
37  
38 decision latitude? Results from Stockholm Heart Epidemiology Program (SHEEP).  
39  
40 *Social Science and Medicine* 1998;46:1405-15.  
41  
42
- 43 16. Johnson JV, Hall EM, Theorell T. Combined effects of job strain and social isolation on  
44  
45 cardiovascular disease morbidity and mortality in a random sample of the  
46  
47 Swedish male working population. *Scandinavian Journal of Work, Environment*  
48  
49 *and Health* 1989;15:271-79.  
50  
51
- 52 17. Akerstedt T, Discacciati A, Miley-Akerstedt A, et al. Aging and the Change in Fatigue  
53  
54 and Sleep - A Longitudinal Study Across 8 Years in Three Age Groups. *Frontiers in*  
55  
56 *Psychology* 2018;9:234.  
57  
58  
59  
60

- 1  
2  
3 18. Nyman T. Low back and neck-shoulder pain : Work and heritability. Karolinska  
4  
5 Institutet, 2008.  
6  
7  
8 19. Widanarko B, Legg S, Devereux J, et al. Interaction between physical and  
9  
10 psychosocial risk factors on the presence of neck/shoulder symptoms and its  
11  
12 consequences. *Ergonomics* 2015;58:1507-18.  
13  
14  
15 20. Clays E, Casini A, Van Herck K, et al. Do psychosocial job resources buffer the relation  
16  
17 between physical work demands and coronary heart disease? A prospective  
18  
19 study among men. *International Archives of Occupational and Environmental*  
20  
21 *Health* 2016;89:1299-307.  
22  
23  
24 21. Krause N, Brand RJ, Arah OA, et al. Occupational physical activity and 20-year  
25  
26 incidence of acute myocardial infarction: results from the Kuopio Ischemic Heart  
27  
28 Disease Risk Factor Study. *Scandinavian Journal of Work Environment and Health*  
29  
30 2015;41:124-39.  
31  
32  
33 22. Åhsberg E. Dimensions of fatigue in different working populations. *Scandinavian*  
34  
35 *Journal of Psychology* 2000;41:231-41.  
36  
37  
38 23. Blafoss R, Sundstrup E, Jakobsen MD, et al. Physical workload and bodily fatigue after  
39  
40 work: cross-sectional study among 5000 workers. *European Journal of Public*  
41  
42 *Health* 2019.  
43  
44  
45 24. Ross D. Ageing and work: an overview. *Occupational Medicine (Lond)* 2010;60:169-  
46  
47 71.  
48  
49  
50 25. Fisher GG, Chaffee DS, Tetrick LE, et al. Cognitive functioning, aging, and work: A  
51  
52 review and recommendations for research and practice. *Journal of Occupational*  
53  
54 *and Health Psychology* 2017;22:314-36.  
55  
56  
57  
58  
59  
60

- 1  
2  
3 26. Magnusson Hanson LL, Leineweber C, Persson V, et al. Cohort Profile: The Swedish  
4  
5 Longitudinal Occupational Survey of Health (SLOSH). *International Journal of*  
6  
7 *Epidemiology* 2018.  
8  
9
- 10 27. Chungkham HS, Ingre M, Karasek R, et al. Factor structure and longitudinal  
11  
12 measurement invariance of the demand control support model: an evidence from  
13  
14 the Swedish Longitudinal Occupational Survey of Health (SLOSH). *PLoS One*  
15  
16 2013;8:e70541.  
17  
18
- 19 28. Kivimäki M, Nyberg ST, Batty GD, et al. Job strain as a risk factor for coronary heart  
20  
21 disease: a collaborative meta-analysis of individual participant data. *The Lancet*  
22  
23 2012;380:1491-97.  
24  
25
- 26 29. Magnusson Hanson LL, Madsen IE, Westerlund H, et al. Antidepressant use and  
27  
28 associations with psychosocial work characteristics. A comparative study of  
29  
30 Swedish and Danish gainfully employed. *Journal of Affective Disorders*  
31  
32 2013;149:38-45.  
33  
34
- 35 30. Åkerstedt T, Knutsson A, Westerholm P, et al. Sleep disturbances, work stress and  
36  
37 work hours. A cross-sectional study. *Journal of Psychosomatic Research*  
38  
39 2002;53:741-48.  
40  
41
- 42 31. Akerstedt T, Ingre M, Broman JE, et al. Disturbed sleep in shift workers, day workers,  
43  
44 and insomniacs. *Chronobiology International* 2008;25:333-48.  
45  
46
- 47 32. Nordin M, Akerstedt T, Nordin S. Psychometric evaluation and normative data for the  
48  
49 Karolinska Sleep Questionnaire. *Sleep and Biological Rhythms* 2013;11:216-26.  
50  
51
- 52 33. Rabe-Hesketh S, Skrondal A. Multilevel and Longitudinal Modeling Using Stata. First  
53  
54 Edition ed. Texas: Stata Press, 2005.  
55  
56
- 57 34. Halonen JI, Shiri R, Hanson LLM, et al. Risk and Prognostic Factors of Low Back Pain:  
58  
59 Repeated Population Based Cohort Study in Sweden. *Spine (Phila Pa 1976)* 2019.  
60



- 1  
2  
3 35. Akerstedt T, Axelsson J, Lekander M, et al. Do sleep, stress, and illness explain daily  
4 variations in fatigue? A prospective study. *Journal of Psychosomatic Research*  
5  
6 2014;76:280-85.  
7  
8  
9  
10 36. Åkerstedt T, Orsini N, Petersen H, et al. Predicting sleep quality from stress and prior  
11 sleep - A study of day-to-day covariation across six weeks. *Sleep Medicine*  
12  
13 2012;13:674-79.  
14  
15  
16  
17 37. Schiller H, Lekander M, Rajaleid K, et al. The impact of reduced worktime on sleep  
18 and perceived stress - a group randomized intervention study using diary data.  
19  
20  
21  
22  
23  
24  
25 38. Dolan P, Kudrna L. More Years, Less Yawns: Fresh Evidence on Tiredness by Age and  
26 Other Factors. *Journal of Gerontology B Psychology Science and Social Science*  
27  
28 2013.  
29  
30  
31  
32  
33  
34  
35  
36  
37  
38  
39  
40  
41  
42  
43  
44  
45  
46  
47  
48  
49  
50  
51  
52  
53  
54  
55  
56  
57  
58  
59  
60

1  
2  
3 **Figure legends**  
4  
5  
6  
7

8 Figure 1. Trajectories of work demands, physical workload, sleep quality, fatigue, sleep  
9 duration weekdays, and sleep duration weekends in three occupational groups. Mean  
10 predicted outcomes at T1 and T5, marginalized over the age and gender distribution at  
11  
12  
13  
14  
15 T1  
16  
17  
18  
19  
20  
21  
22  
23  
24  
25  
26  
27  
28  
29  
30  
31  
32  
33  
34  
35  
36  
37  
38  
39  
40  
41  
42  
43  
44  
45  
46  
47  
48  
49  
50  
51  
52  
53  
54  
55  
56  
57  
58  
59  
60

1  
2  
3  
11  
12  
13  
14  
15  
16  
17  
18  
19  
20

Work demands

BMJ Open

Physical workload

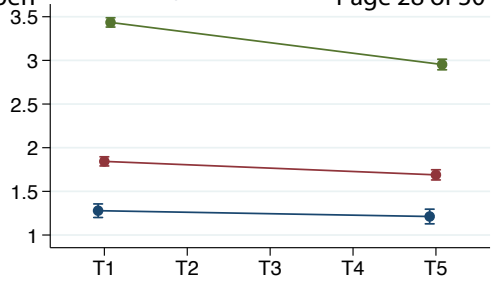

Fatigue

Sleep problems

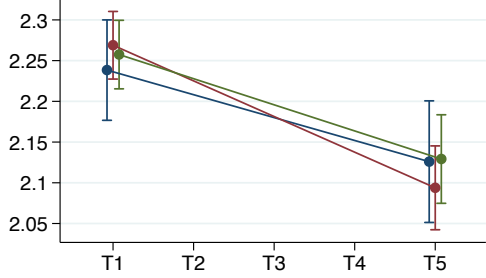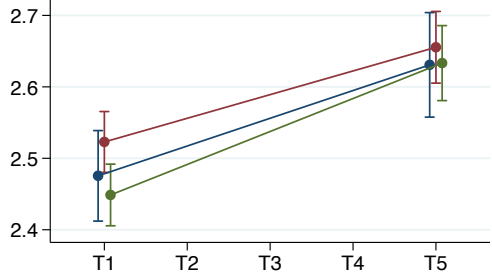

Wave

For peer review only - <http://bmjopen.bmj.com/site/about/guidelines.xhtml>



STROBE Statement—Checklist of items that should be included in reports of *cohort studies*

|                              | Item No    | Recommendation                                                                                                                                                                                                                                                                                                                                                                                                |
|------------------------------|------------|---------------------------------------------------------------------------------------------------------------------------------------------------------------------------------------------------------------------------------------------------------------------------------------------------------------------------------------------------------------------------------------------------------------|
| <b>Title and abstract</b>    | <b>1</b>   | (a) Indicate the study's design with a commonly used term in the title or the abstract<br>(b) Provide in the abstract an informative and balanced summary of what was done and what was found                                                                                                                                                                                                                 |
| <b>Introduction</b>          |            |                                                                                                                                                                                                                                                                                                                                                                                                               |
| Background/rationale         | <b>2</b>   | Explain the scientific background and rationale for the investigation being reported                                                                                                                                                                                                                                                                                                                          |
| Objectives                   | <b>3</b>   | State specific objectives, including any prespecified hypotheses                                                                                                                                                                                                                                                                                                                                              |
| <b>Methods</b>               |            |                                                                                                                                                                                                                                                                                                                                                                                                               |
| Study design                 | <b>4</b>   | Present key elements of study design early in the paper                                                                                                                                                                                                                                                                                                                                                       |
| Setting                      | <b>5</b>   | Describe the setting, locations, and relevant dates, including periods of recruitment, exposure, follow-up, and data collection                                                                                                                                                                                                                                                                               |
| Participants                 | <b>6</b>   | (a) Give the eligibility criteria, and the sources and methods of selection of participants. Describe methods of follow-up<br>(b) For matched studies, give matching criteria and number of exposed and unexposed                                                                                                                                                                                             |
| Variables                    | <b>7</b>   | Clearly define all outcomes, exposures, predictors, potential confounders, and effect modifiers. Give diagnostic criteria, if applicable                                                                                                                                                                                                                                                                      |
| Data sources/<br>measurement | <b>8*</b>  | For each variable of interest, give sources of data and details of methods of assessment (measurement). Describe comparability of assessment methods if there is more than one group                                                                                                                                                                                                                          |
| Bias                         | <b>9</b>   | Describe any efforts to address potential sources of bias                                                                                                                                                                                                                                                                                                                                                     |
| Study size                   | <b>10</b>  | Explain how the study size was arrived at                                                                                                                                                                                                                                                                                                                                                                     |
| Quantitative variables       | <b>11</b>  | Explain how quantitative variables were handled in the analyses. If applicable, describe which groupings were chosen and why                                                                                                                                                                                                                                                                                  |
| Statistical methods          | <b>12</b>  | (a) Describe all statistical methods, including those used to control for confounding<br>(b) Describe any methods used to examine subgroups and interactions<br>(c) Explain how missing data were addressed<br>(d) If applicable, explain how loss to follow-up was addressed<br>(e) Describe any sensitivity analyses                                                                                        |
| <b>Results</b>               |            |                                                                                                                                                                                                                                                                                                                                                                                                               |
| Participants                 | <b>13*</b> | (a) Report numbers of individuals at each stage of study—eg numbers potentially eligible, examined for eligibility, confirmed eligible, included in the study, completing follow-up, and analysed<br>(b) Give reasons for non-participation at each stage<br>(c) Consider use of a flow diagram                                                                                                               |
| Descriptive data             | <b>14*</b> | (a) Give characteristics of study participants (eg demographic, clinical, social) and information on exposures and potential confounders<br>(b) Indicate number of participants with missing data for each variable of interest<br>(c) Summarise follow-up time (eg, average and total amount)                                                                                                                |
| Outcome data                 | <b>15*</b> | Report numbers of outcome events or summary measures over time                                                                                                                                                                                                                                                                                                                                                |
| Main results                 | <b>16</b>  | (a) Give unadjusted estimates and, if applicable, confounder-adjusted estimates and their precision (eg, 95% confidence interval). Make clear which confounders were adjusted for and why they were included<br>(b) Report category boundaries when continuous variables were categorized<br>(c) If relevant, consider translating estimates of relative risk into absolute risk for a meaningful time period |

|                    |                          |    |                                                                                                                                                                            |
|--------------------|--------------------------|----|----------------------------------------------------------------------------------------------------------------------------------------------------------------------------|
| 1<br>2<br>3        | Other analyses           | 17 | Report other analyses done—eg analyses of subgroups and interactions, and sensitivity analyses                                                                             |
| 4                  | <b>Discussion</b>        |    |                                                                                                                                                                            |
| 5                  | Key results              | 18 | Summarise key results with reference to study objectives                                                                                                                   |
| 6<br>7             | Limitations              | 19 | Discuss limitations of the study, taking into account sources of potential bias or imprecision. Discuss both direction and magnitude of any potential bias                 |
| 8<br>9<br>10<br>11 | Interpretation           | 20 | Give a cautious overall interpretation of results considering objectives, limitations, multiplicity of analyses, results from similar studies, and other relevant evidence |
| 12                 | Generalisability         | 21 | Discuss the generalisability (external validity) of the study results                                                                                                      |
| 13                 | <b>Other information</b> |    |                                                                                                                                                                            |
| 14<br>15<br>16     | Funding                  | 22 | Give the source of funding and the role of the funders for the present study and, if applicable, for the original study on which the present article is based              |

\*Give information separately for exposed and unexposed groups.

**Note:** An Explanation and Elaboration article discusses each checklist item and gives methodological background and published examples of transparent reporting. The STROBE checklist is best used in conjunction with this article (freely available on the Web sites of PLoS Medicine at <http://www.plosmedicine.org/>, Annals of Internal Medicine at <http://www.annals.org/>, and Epidemiology at <http://www.epidem.com/>). Information on the STROBE Initiative is available at <http://www.strobe-statement.org>.
